# Supplementary material for: Rhodium( iii )-catalyzed direct C–H activation of 2-aryl-3 H -indoles: a strategy for 4-heteroaryl pyrazole synthesis
Source: Royal Society of Chemistry journal article supplement (doi:10.1039/d4ob01655f), 2024-11-19
Supplement: d4ob01655f1.pdf [file d4ob01655f1.pdf]

## Supporting information

Rhodium(III)-Catalyzed direct C-H activation of 2-Aryl-3*H*-indoles: A strategy for 4-heteroaryl pyrazoles synthesis

Zi Yang\*,<sup>1</sup> Ji Luo,<sup>2</sup> Wenbo Zhang,<sup>2</sup> Jieni Lei,<sup>1</sup> Chaoshui Liu,<sup>2</sup> Yaqian Li\*<sup>1</sup>

1. Hunan Provincial University Key Laboratory of the Fundamental and Clinical Research on Functional Nucleic Acid, Changsha Medical University, Changsha 410219, P. R. China
2. Hunan Key Laboratory of the Research and Development of Novel Pharmaceutical Preparations, Changsha Medical University, Changsha 410219, P. R. China

Email: yangziycy@163.com

### Table of Contents

|                                                                                        |     |
|----------------------------------------------------------------------------------------|-----|
| 1. General information.....                                                            | S2  |
| 2. Typical procedure for synthesis of <b>3</b> .....                                   | S2  |
| 3. Mechanism experiments.....                                                          | S2  |
| 4. The Crystal Structure of Product <b>3ha</b> .....                                   | S4  |
| 5. Characterization of compounds <b>3</b> .....                                        | S5  |
| 6. References.....                                                                     | S16 |
| 7. Copies of <sup>1</sup> H, <sup>13</sup> C, and <sup>19</sup> F NMR of products..... | S22 |
| 8. Cell antiproliferative activity assay.....                                          | S47 |

## 1. General Information

All chemicals were analytically pure and used directly after purchased. All solvents were used without any particular precautions to extrude moisture.  $^1\text{H}$  NMR spectra were recorded on 400 MHz spectrometer, and  $^{13}\text{C}$  NMR spectra were recorded on a 100 MHz spectrometer. All spectra were referenced to the solvent peaks ( $^1\text{H}$ : residual  $\text{CDCl}_3 = 7.26$  ppm,  $^{13}\text{C}$ :  $\text{CDCl}_3 = 77.00$  ppm). High-resolution mass spectra (HRMS) were equipped with an ESI source and a TOF detector. Column chromatography was performed on silica gel (70-230 mesh ASTM) using the reported eluents. Thin-layer chromatography (TLC) was carried out on  $4 \times 15$  cm plates with a layer thickness of 0.2 mm (silica gel 60 F254). 2-phenyl-3*H*-indoles<sup>[1]</sup> and diazopyrazolones<sup>[2]</sup> were synthesized according to the previously reported procedure.

## 2. Typical procedure for synthesis of 3

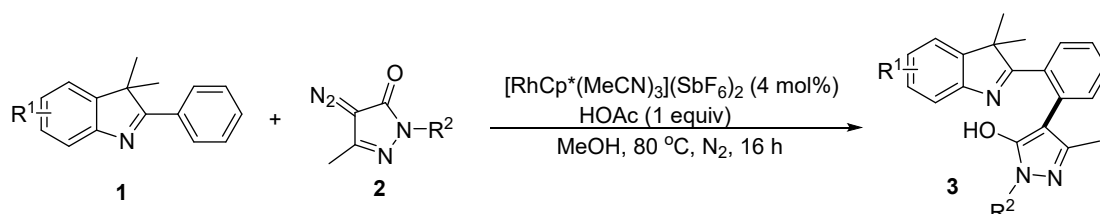

To a tube equipped with magnetic stir bar, 2-phenyl-3*H*-indoles (**1**, 0.20 mmol), diazopyrazolones (**2**, 0.30 mmol),  $[\text{RhCp}^*(\text{MeCN})_3](\text{SbF}_6)_2$  (4 mol%), and HOAc (1 equiv.) in MeOH (2.0 mL) were added and stirred at 80 °C for 16 h under  $\text{N}_2$  atmosphere. After removal of the solvent under reduced pressure, purification was performed by flash column chromatography on silica gel with petroleum ether/ethyl acetate (gradient mixture ratio from 20:1 to 10:1) as eluent to afford the corresponding products.

## 3. Mechanism Experiments

### (1) H/D exchange

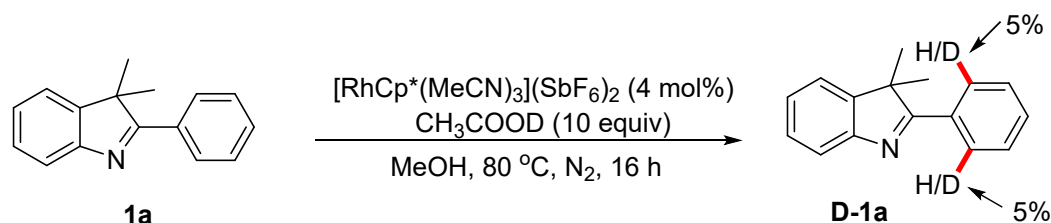

To a tube equipped with magnetic stir bar, 2-phenyl-3*H*-indole (**1a**, 0.20 mmol),  $[\text{RhCp}^*(\text{MeCN})_3](\text{SbF}_6)_2$  (4 mol%), and  $\text{CH}_3\text{COOD}$  (2.0 mmol, 10 equiv.) in MeOH (2.0 mL) were added and stirred at 80 °C for 16 h under  $\text{N}_2$  atmosphere. After removal

of the solvent under reduced pressure, purification was performed by flash column chromatography on silica gel with petroleum ether/ethyl acetate (gradient mixture ratio from 30:1 to 20:1) as eluent to afford the corresponding products **D-1a**. The D-incorporation in **D-1a** was determined by  $^1\text{H-NMR}$  spectroscopy.

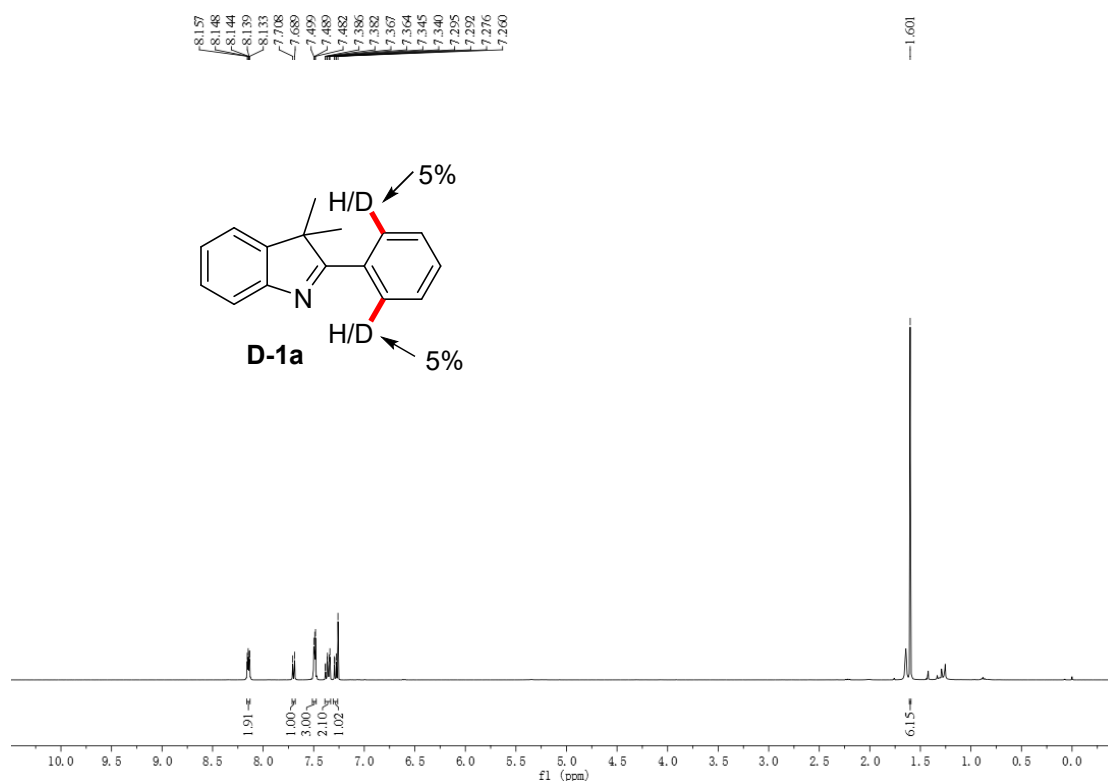

## (2) General procedure for estimation of the KIE:

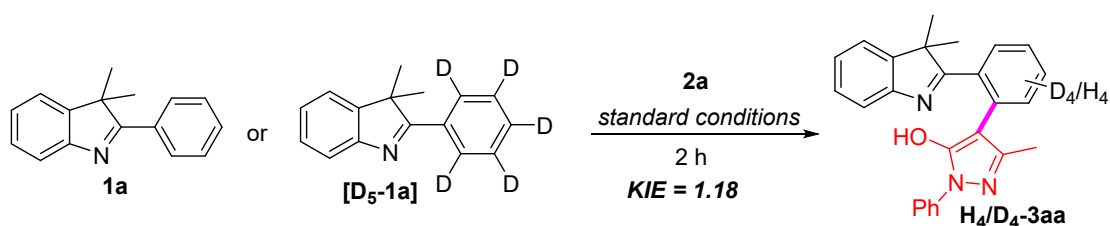

To two separated tube charged with 2-phenyl-3*H*-indole (**1a**, 0.20 mmol) or **D<sub>5</sub>-1a** (0.20 mmol), diazopyrazolones (**2a**, 0.3 mmol),  $[\text{RhCp}^*(\text{MeCN})_3](\text{SbF}_6)_2$  (4 mol%), and HOAc (1 equiv.) in MeOH (2.0 mL) were added and stirred at 80 °C for 2 h under  $\text{N}_2$  atmosphere. After removal of the solvent under reduced pressure, purification was performed by flash column chromatography on silica gel with petroleum ether/ethyl acetate (gradient mixture ratio from 20:1 to 10:1) as eluent to afford the corresponding products **3aa** (31.4 mg, 40%) and **D<sub>4</sub>-3aa** (26.9 mg, 34%).

### (3) Intermolecular competition reaction with differently substituted 2-phenyl-3*H*-indoles

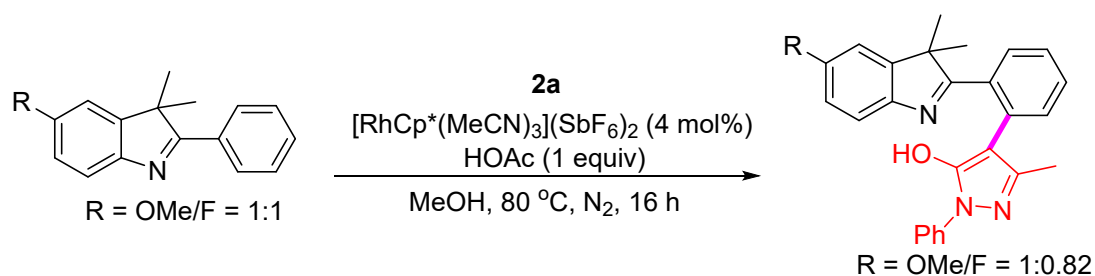

A suspension of 2-phenyl-3*H*-indole (**1f**, 0.2 mmol) and (**1g**, 0.2 mmol), **2a** (68.4 mg, 0.3 mmol), [RhCp\*(MeCN)<sub>3</sub>](SbF<sub>6</sub>)<sub>2</sub> (4 mol%), and HOAc (1 equiv.) in MeOH (2.0 mL) were added and stirred at 80 °C for 16 h under N<sub>2</sub> atmosphere. After removal of the solvent under reduced pressure, purification was performed by flash column chromatography on silica gel with petroleum ether/ethyl acetate (gradient mixture ratio from 20:1 to 10:1) as eluent to afford the corresponding products **3fa** and **3ga** at a ratio of 1:0.82.

#### 4. The Crystal Structure of Product 3ha

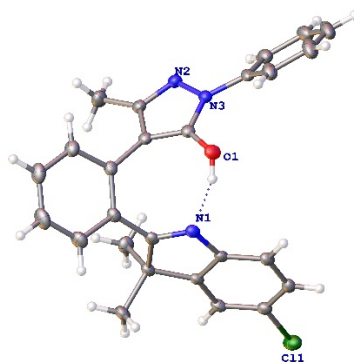

X-ray molecular structure of 3ha

**Table 1** Crystal data and structure refinement for exp\_13844\_auto.

|                     |                                                    |
|---------------------|----------------------------------------------------|
| Identification code | exp_13844_auto                                     |
| Empirical formula   | C <sub>26</sub> H <sub>22</sub> ClN <sub>3</sub> O |
| Formula weight      | 427.91                                             |
| Temperature/K       | 293.15                                             |
| Crystal system      | monoclinic                                         |
| Space group         | P2 <sub>1</sub> /n                                 |
| a/Å                 | 9.4744(9)                                          |
| b/Å                 | 16.0747(14)                                        |
| c/Å                 | 14.7594(11)                                        |
| α/°                 | 90                                                 |
| β/°                 | 99.735(9)                                          |
| γ/°                 | 90                                                 |

|                                             |                                                               |
|---------------------------------------------|---------------------------------------------------------------|
| Volume/Å <sup>3</sup>                       | 2215.5(3)                                                     |
| Z                                           | 4                                                             |
| $\rho_{\text{calc}}/\text{cm}^3$            | 1.283                                                         |
| $\mu/\text{mm}^{-1}$                        | 0.195                                                         |
| F(000)                                      | 896.0                                                         |
| Crystal size/mm <sup>3</sup>                | 0.14 × 0.12 × 0.1                                             |
| Radiation                                   | Mo K $\alpha$ ( $\lambda$ = 0.71073)                          |
| 2 $\theta$ range for data collection/°      | 4.768 to 58.622                                               |
| Index ranges                                | -12 ≤ h ≤ 10, -21 ≤ k ≤ 18, -14 ≤ l ≤ 19                      |
| Reflections collected                       | 11487                                                         |
| Independent reflections                     | 5140 [R <sub>int</sub> = 0.0290, R <sub>sigma</sub> = 0.0451] |
| Data/restraints/parameters                  | 5140/0/283                                                    |
| Goodness-of-fit on F <sup>2</sup>           | 1.030                                                         |
| Final R indexes [I >= 2 $\sigma$ (I)]       | R <sub>1</sub> = 0.0542, wR <sub>2</sub> = 0.1094             |
| Final R indexes [all data]                  | R <sub>1</sub> = 0.0873, wR <sub>2</sub> = 0.1247             |
| Largest diff. peak/hole / e Å <sup>-3</sup> | 0.18/-0.23                                                    |

## 5. Characterization of compounds 3

### 4-(2-(3,3-dimethyl-3*H*-indol-2-yl)phenyl)-3-methyl-1-phenyl-1*H*-pyrazol-5-ol (3aa)

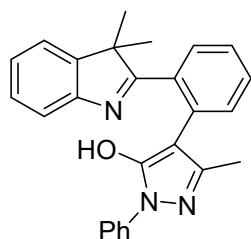

The compound prepared using [Cp\**Rh*(MeCN)<sub>3</sub>](SbF<sub>6</sub>)<sub>2</sub> (6.6 mg, 0.008 mmol), 3,3-dimethyl-2-phenyl-3*H*-indole (44.2 mg, 0.2 mmol), 4-diazo-5-methyl-2-phenyl-2,4-dihydro-3*H*-pyrazol-3-one (60.0 mg, 0.3 mmol, 1.5 equiv.), and HOAc (12 mg, 0.2 mmol, 1 equiv.). After 16 h, it was cooled to room temperature and concentrated under reduced pressure. The residue was purified by silica gel column chromatography (petroleum ether/ethyl acetate = 10:1) to afford **3aa** as a yellow liquid (56.6 mg, 72%). **<sup>1</sup>H NMR (400 MHz, CDCl<sub>3</sub>)**  $\delta$  12.46 (s, 1H), 7.82 (d, *J* = 8.0 Hz, 2H), 7.62 (d, *J* = 7.5 Hz, 1H), 7.55 (t, *J* = 8.3 Hz, 2H), 7.43 (dd, *J* = 17.7, 8.1 Hz, 4H), 7.38 - 7.27 (m, 3H), 7.22 (t, *J* = 7.4 Hz, 1H), 2.19 (s, 3H), 1.65 (s, 3H), 1.08 (s, 3H). **<sup>13</sup>C NMR (100 MHz, CDCl<sub>3</sub>)**  $\delta$  187.9, 173.1, 169.8, 163.1, 159.8, 150.6, 150.1, 146.8, 144.8, 138.9, 133.3, 132.9, 131.9, 129.7, 128.6, 127.9, 127.3, 126.4, 125.4, 121.7, 121.5, 104.2, 55.6, 23.5, 22.2, 12.9. **HRMS (ESI)**: Calcd for C<sub>26</sub>H<sub>23</sub>N<sub>3</sub>O [M+H]<sup>+</sup>: 394.1914; found: 394.1915.

**3-methyl-1-phenyl-4-(2-(3,3,5-trimethyl-3*H*-indol-2-yl)phenyl)-1*H*-pyrazol-5-ol (3ba)**

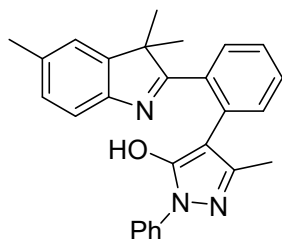

The compound prepared using  $[\text{Cp}^*\text{Rh}(\text{MeCN})_3](\text{SbF}_6)_2$  (6.6 mg, 0.008 mmol), 3,3,5-trimethyl-2-phenyl-3*H*-indole (47.0 mg, 0.2 mmol), 4-diazo-5-methyl-2-phenyl-2,4-dihydro-3*H*-pyrazol-3-one (60.0 mg, 0.3 mmol, 1.5 equiv.), and HOAc (12 mg, 0.2 mmol, 1 equiv.). After 16 h, it was cooled to room temperature and concentrated under reduced pressure. The residue was purified by silica gel column chromatography (petroleum ether/ethyl acetate = 10:1) to afford **3ba** as a yellow liquid (50.5 mg, 62%).  $^1\text{H NMR}$  (400 MHz,  $\text{CDCl}_3$ )  $\delta$  7.78 (d,  $J = 7.8$  Hz, 2H), 7.54 (t,  $J = 7.1$  Hz, 2H), 7.49 (d,  $J = 7.8$  Hz, 1H), 7.42 (dt,  $J = 16.0, 8.0$  Hz, 4H), 7.21 (t,  $J = 7.4$  Hz, 1H), 7.17 - 7.11 (m, 2H), 2.41 (s, 3H), 2.17 (s, 3H), 1.64 (s, 3H), 1.05 (s, 3H).  $^{13}\text{C NMR}$  (100 MHz,  $\text{CDCl}_3$ )  $\delta$  186.8, 150.7, 148.0, 146.8, 145.1, 138.9, 136.8, 133.5, 133.0, 132.1, 129.7, 128.6, 127.4, 126.4, 125.5, 122.4, 121.6, 119.2, 118.6, 104.3, 55.5, 23.6, 22.4, 21.5, 12.9. HRMS (ESI): Calcd for  $\text{C}_{27}\text{H}_{25}\text{N}_3\text{O}$   $[\text{M}+\text{H}]^+$ : 408.2070; found: 408.2071.

**4-(2-(5-ethyl-3,3-dimethyl-3*H*-indol-2-yl)phenyl)-3-methyl-1-phenyl-1*H*-pyrazol-5-ol (3ca)**

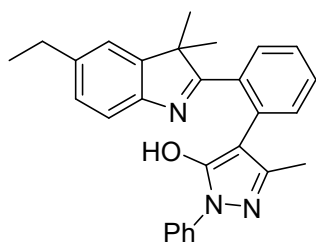

The compound prepared using  $[\text{Cp}^*\text{Rh}(\text{MeCN})_3](\text{SbF}_6)_2$  (6.6 mg, 0.008 mmol), 5-ethyl-3,3-dimethyl-2-phenyl-3*H*-indole (49.8 mg, 0.2 mmol), 4-diazo-5-methyl-2-phenyl-2,4-dihydro-3*H*-pyrazol-3-one (60.0 mg, 0.3 mmol, 1.5 equiv.), and HOAc (12 mg, 0.2 mmol, 1 equiv.). After 16 h, it was cooled to room temperature and concentrated under reduced pressure. The residue was purified by silica gel column chromatography (petroleum ether/ethyl acetate = 10:1) to afford **3ca** as a pale yellow solid (53.1 mg, 63%). m.p. 112-114 °C.

$^1\text{H NMR}$  (400 MHz,  $\text{CDCl}_3$ )  $\delta$  7.76 (d,  $J = 7.8$  Hz, 2H), 7.57 - 7.48 (m, 3H), 7.46 - 7.36 (m, 4H), 7.25 - 7.11 (m, 3H), 2.70 (q,  $J = 7.6$  Hz, 2H), 2.16 (s, 3H), 1.64 (s, 3H),

1.28 - 1.23 (m, 3H), 1.05 (s, 3H).  $^{13}\text{C}$  NMR (100 MHz,  $\text{CDCl}_3$ )  $\delta$  186.9, 150.8, 148.2, 146.9, 145.1, 143.4, 138.9, 133.6, 133.1, 132.1, 129.7, 128.6, 127.6, 127.5, 126.5, 125.5, 121.7, 121.2, 119.4, 104.3, 55.6, 28.9, 23.7, 22.5, 15.9, 12.9. HRMS (ESI): Calcd for  $\text{C}_{28}\text{H}_{27}\text{N}_3\text{O}$   $[\text{M}+\text{H}]^+$ : 422.2227; found: 422.2227.

**4-(2-(5-isopropyl-3,3-dimethyl-3H-indol-2-yl)phenyl)-3-methyl-1-phenyl-1H-pyrazol-5-ol (3da)**

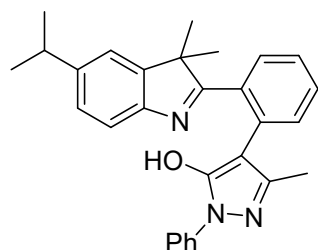

The compound prepared using  $[\text{Cp}^*\text{Rh}(\text{MeCN})_3](\text{SbF}_6)_2$  (6.6 mg, 0.008 mmol), 5-isopropyl-3,3-dimethyl-2-phenyl-3H-indole (52.6 mg, 0.2 mmol), 4-diazo-5-methyl-2-phenyl-2,4-dihydro-3H-pyrazol-3-one (60.0 mg, 0.3 mmol, 1.5 equiv.), and HOAc (12 mg, 0.2 mmol, 1 equiv.). After 16 h, it was cooled to room temperature and concentrated under reduced pressure. The residue was purified by silica gel column chromatography (petroleum ether/ethyl acetate = 10:1) to afford **3da** as a pale yellow solid (52.2 mg, 60%). m.p. 174-176 °C.

$^1\text{H}$  NMR (400 MHz,  $\text{CDCl}_3$ )  $\delta$  12.58 (s, 1H), 7.84 - 7.75 (m, 2H), 7.58 - 7.49 (m, 3H), 7.47 - 7.34 (m, 4H), 7.24 - 7.18 (m, 2H), 7.17 (d,  $J = 1.2$  Hz, 1H), 2.97 (hept,  $J = 6.9$  Hz, 1H), 2.16 (s, 3H), 1.66 (s, 3H), 1.27 (d,  $J = 6.9$  Hz, 6H), 1.06 (s, 3H).  $^{13}\text{C}$  NMR (100 MHz,  $\text{CDCl}_3$ )  $\delta$  187.2, 150.8, 148.3, 148.1, 146.8, 145.1, 139.1, 133.5, 133.1, 132.1, 129.7, 128.6, 127.4, 126.4, 126.1, 125.4, 121.6, 119.7, 119.3, 104.3, 55.6, 34.3, 24.2, 23.8, 22.5, 13.0. HRMS (ESI): Calcd for  $\text{C}_{29}\text{H}_{29}\text{N}_3\text{O}$   $[\text{M}+\text{H}]^+$ : 436.2383; found: 436.2383.

**4-(2-(5-(tert-butyl)-3,3-dimethyl-3H-indol-2-yl)phenyl)-3-methyl-1-phenyl-1H-pyrazol-5-ol (3ea)**

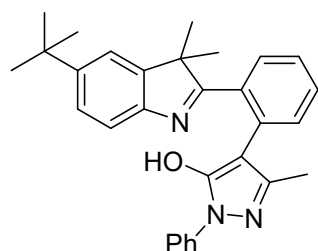

The compound prepared using  $[\text{Cp}^*\text{Rh}(\text{MeCN})_3](\text{SbF}_6)_2$  (6.6 mg, 0.008 mmol), 5-(tert-

butyl)-3,3-dimethyl-2-phenyl-3*H*-indole (55.4 mg, 0.2 mmol), 4-diazo-5-methyl-2-phenyl-2,4-dihydro-3*H*-pyrazol-3-one (60.0 mg, 0.3 mmol, 1.5 equiv.), and HOAc (12 mg, 0.2 mmol, 1 equiv.). After 16 h, it was cooled to room temperature and concentrated under reduced pressure. The residue was purified by silica gel column chromatography (petroleum ether/ethyl acetate = 10:1) to afford **3ea** as a pale yellow liquid (55.7 mg, 62%).

**<sup>1</sup>H NMR (400 MHz, CDCl<sub>3</sub>)** δ 12.64 (s, 1H), 7.80 (d, *J* = 7.9 Hz, 2H), 7.58 - 7.50 (m, 3H), 7.46 - 7.36 (m, 5H), 7.33 (d, *J* = 1.5 Hz, 1H), 7.21 (t, *J* = 7.4 Hz, 1H), 2.16 (s, 3H), 1.67 (s, 3H), 1.35 (s, 9H), 1.07 (s, 3H). **<sup>13</sup>C NMR (100 MHz, CDCl<sub>3</sub>)** δ 187.5, 150.8, 150.3, 147.9, 146.9, 144.7, 139.0, 133.6, 133.1, 132.2, 129.7, 128.6, 127.5, 126.4, 125.4, 125.2, 121.6, 118.9, 118.6, 104.4, 55.7, 35.0, 31.6, 23.9, 22.6, 13.0. **HRMS (ESI)**: Calcd for C<sub>30</sub>H<sub>31</sub>N<sub>3</sub>O [M+H]<sup>+</sup>: 450.2540; found: 450.2540.

#### 4-(2-(5-methoxy-3,3-dimethyl-3*H*-indol-2-yl)phenyl)-3-methyl-1-phenyl-1*H*-pyrazol-5-ol (**3fa**)

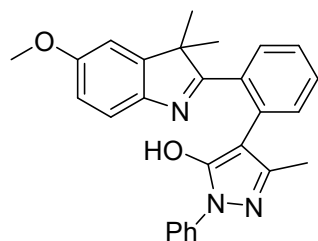

The compound prepared using [Cp\**Rh*(MeCN)<sub>3</sub>](SbF<sub>6</sub>)<sub>2</sub> (6.6 mg, 0.008 mmol), 5-methoxy-3,3-dimethyl-2-phenyl-3*H*-indole (50.2 mg, 0.2 mmol), 4-diazo-5-methyl-2-phenyl-2,4-dihydro-3*H*-pyrazol-3-one (60.0 mg, 0.3 mmol, 1.5 equiv.), and HOAc (12 mg, 0.2 mmol, 1 equiv.). After 16 h, it was cooled to room temperature and concentrated under reduced pressure. The residue was purified by silica gel column chromatography (petroleum ether/ethyl acetate = 4:1) to afford **3fa** as a pale yellow solid (57.5 mg, 68%). m.p. 118-120 °C.

**<sup>1</sup>H NMR (400 MHz, CDCl<sub>3</sub>)** δ 7.78 (d, *J* = 8.1 Hz, 2H), 7.57 - 7.48 (m, 3H), 7.46 - 7.36 (m, 4H), 7.21 (t, *J* = 7.4 Hz, 1H), 6.90 - 6.79 (m, 2H), 3.82 (s, 3H), 2.16 (s, 3H), 1.63 (s, 3H), 1.05 (s, 3H). **<sup>13</sup>C NMR (100 MHz, CDCl<sub>3</sub>)** δ 185.8, 159.1, 150.7, 146.9, 146.7, 143.8, 138.9, 133.5, 133.0, 132.1, 129.7, 128.6, 127.5, 126.4, 125.5, 121.6, 120.2, 112.7, 108.3, 104.3, 55.7, 55.7, 23.8, 22.5, 12.9. **HRMS (ESI)**: Calcd for C<sub>27</sub>H<sub>25</sub>N<sub>3</sub>O<sub>2</sub> [M+H]<sup>+</sup>: 424.2020; found: 424.2019.

#### 4-(2-(5-fluoro-3,3-dimethyl-3*H*-indol-2-yl)phenyl)-3-methyl-1-phenyl-1*H*-pyrazol-5-ol (**3ga**)



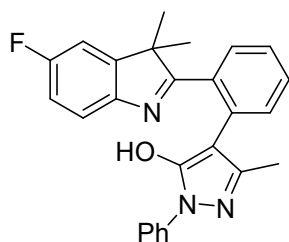

The compound prepared using  $[\text{Cp}^*\text{Rh}(\text{MeCN})_3](\text{SbF}_6)_2$  (6.6 mg, 0.008 mmol), 5-fluoro-3,3-dimethyl-2-phenyl-3*H*-indole (47.8 mg, 0.2 mmol), 4-diazo-5-methyl-2-phenyl-2,4-dihydro-3*H*-pyrazol-3-one (60.0 mg, 0.3 mmol, 1.5 equiv.), and HOAc (12 mg, 0.2 mmol, 1 equiv.). After 16 h, it was cooled to room temperature and concentrated under reduced pressure. The residue was purified by silica gel column chromatography (petroleum ether/ethyl acetate = 10:1) to afford **3ga** as a pale white solid (47.7 mg, 58%). m.p. 172-174 °C.

$^1\text{H NMR}$  (400 MHz,  $\text{CDCl}_3$ )  $\delta$  12.12 (s, 1H), 7.77 (d,  $J = 8.3$  Hz, 2H), 7.54 (dd,  $J = 13.8, 7.4$  Hz, 3H), 7.48 - 7.34 (m, 4H), 7.21 (t,  $J = 7.4$  Hz, 1H), 7.03 (dd,  $J = 14.6, 5.3$  Hz, 2H), 2.16 (s, 3H), 1.63 (s, 3H), 1.05 (s, 3H).  $^{13}\text{C NMR}$  (100 MHz,  $\text{CDCl}_3$ )  $\delta$  188.0, 161.9 (d,  $J = 247.0$  Hz), 150.4, 147.1 (d,  $J_{\text{C-F}} = 6.7$  Hz), 146.8, 146.22, 138.9, 133.1 (d,  $J_{\text{C-F}} = 9.9$  Hz), 131.9, 129.9, 128.6, 127.4, 126.5, 125.5, 121.5, 120.6 (d,  $J_{\text{C-F}} = 8.3$  Hz), 114.8 (d,  $J_{\text{C-F}} = 24.0$  Hz), 109.5 (d,  $J_{\text{C-F}} = 24.6$  Hz), 104.2, 56.1 (d,  $J_{\text{C-F}} = 1.9$  Hz), 23.5, 22.2, 13.1.  $^{19}\text{F NMR}$  (376 MHz,  $\text{CDCl}_3$ )  $\delta$  -114.23. HRMS (ESI): Calcd for  $\text{C}_{26}\text{H}_{22}\text{FN}_3\text{O}$   $[\text{M}+\text{H}]^+$ : 412.1820; found: 412.1820.

#### 4-(2-(5-chloro-3,3-dimethyl-3*H*-indol-2-yl)phenyl)-3-methyl-1-phenyl-1*H*-pyrazol-5-ol (**3ha**)

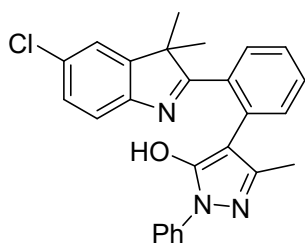

The compound prepared using  $[\text{Cp}^*\text{Rh}(\text{MeCN})_3](\text{SbF}_6)_2$  (6.6 mg, 0.008 mmol), 5-chloro-3,3-dimethyl-2-phenyl-3*H*-indole (51.0 mg, 0.2 mmol), 4-diazo-5-methyl-2-phenyl-2,4-dihydro-3*H*-pyrazol-3-one (60.0 mg, 0.3 mmol, 1.5 equiv.), and HOAc (12 mg, 0.2 mmol, 1 equiv.). After 16 h, it was cooled to room temperature and concentrated under reduced pressure. The residue was purified by silica gel column chromatography (petroleum ether/ethyl acetate = 10:1) to afford **3ha** as a yellow solid (52.1 mg, 61%). m.p. 142-144 °C.

**<sup>1</sup>H NMR (400 MHz, CDCl<sub>3</sub>)** δ 11.98 (s, 1H), 7.74 (d, *J* = 8.0 Hz, 2H), 7.53 (dt, *J* = 14.4, 7.1 Hz, 3H), 7.42 (dt, *J* = 19.1, 7.7 Hz, 4H), 7.34 - 7.26 (m, 2H), 7.21 (t, *J* = 7.4 Hz, 1H), 2.15 (s, 3H), 1.64 (s, 3H), 1.05 (s, 3H). **<sup>13</sup>C NMR (100 MHz, CDCl<sub>3</sub>)** δ 188.6, 150.4, 148.8, 146.9, 138.9, 133.2, 132.0, 130.0, 128.7, 128.3, 127.4, 126.6, 125.6, 122.4, 121.6, 120.7, 104.1, 56.1, 23.5, 22.2, 13.0. **HRMS (ESI):** Calcd for C<sub>26</sub>H<sub>22</sub>ClN<sub>3</sub>O [M+H]<sup>+</sup>: 428.1524; found: 428.1524.

**4-(2-(5-bromo-3,3-dimethyl-3*H*-indol-2-yl)phenyl)-3-methyl-1-phenyl-1*H*-pyrazol-5-ol (3ia)**

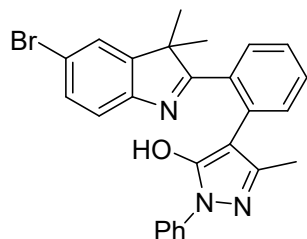

The compound prepared using [Cp\*Rh(MeCN)<sub>3</sub>](SbF<sub>6</sub>)<sub>2</sub> (6.6 mg, 0.008 mmol), 5-bromo-3,3-dimethyl-2-phenyl-3*H*-indole (59.8 mg, 0.2 mmol), 4-diazo-5-methyl-2-phenyl-2,4-dihydro-3*H*-pyrazol-3-one (60.0 mg, 0.3 mmol, 1.5 equiv.), and HOAc (12 mg, 0.2 mmol, 1 equiv.). After 16 h, it was cooled to room temperature and concentrated under reduced pressure. The residue was purified by silica gel column chromatography (petroleum ether/ethyl acetate = 10:1) to afford **3ia** as a pale yellow solid (63.1 mg, 67%). m.p. 177-179 °C.

**<sup>1</sup>H NMR (400 MHz, CDCl<sub>3</sub>)** δ 11.92 (s, 1H), 7.74 (d, *J* = 8.1 Hz, 2H), 7.54 (dd, *J* = 16.3, 7.8 Hz, 2H), 7.49 - 7.32 (m, 7H), 7.21 (t, *J* = 7.3 Hz, 1H), 2.15 (s, 3H), 1.64 (s, 3H), 1.05 (s, 3H). **<sup>13</sup>C NMR (100 MHz, CDCl<sub>3</sub>)** δ 188.6, 150.3, 149.3, 146.8, 138.9, 133.2, 131.9, 131.2, 130.0, 128.7, 127.3, 126.6, 126.6, 125.6, 125.3, 121.6, 121.2, 118.7, 118.6, 104.2, 56.1, 23.5, 22.2, 13.0. **HRMS (ESI):** Calcd for C<sub>26</sub>H<sub>22</sub>BrN<sub>3</sub>O [M+H]<sup>+</sup>: 472.1019; found: 472.1017.

**4-(5-bromo-2-(3,3-dimethyl-3*H*-indol-2-yl)phenyl)-3-methyl-1-phenyl-1*H*-pyrazol-5-ol (3la)**

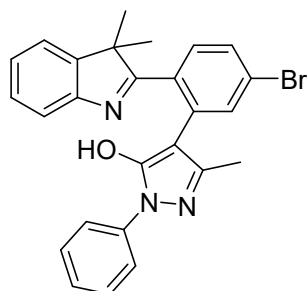

The compound prepared using  $[\text{Cp}^*\text{Rh}(\text{MeCN})_3](\text{SbF}_6)_2$  (6.6 mg, 0.008 mmol), 2-(4-bromophenyl)-3,3-dimethyl-3*H*-indole (59.8 mg, 0.2 mmol), 4-diazo-5-methyl-2-phenyl-2,4-dihydro-3*H*-pyrazol-3-one (60.0 mg, 0.3 mmol, 1.5 equiv.), and HOAc (12 mg, 0.2 mmol, 1 equiv.). After 16 h, it was cooled to room temperature and concentrated under reduced pressure. The residue was purified by silica gel column chromatography (petroleum ether/ethyl acetate = 10:1) to afford **3la** as a yellow liquid (71.6 mg, 76%).  $^1\text{H NMR}$  (400 MHz,  $\text{CDCl}_3$ )  $\delta$  12.44 (s, 1H), 7.75 (d,  $J = 7.9$  Hz, 2H), 7.58 (q,  $J = 4.8$  Hz, 3H), 7.45 – 7.28 (m, 6H), 7.22 (t,  $J = 7.4$  Hz, 1H), 2.17 (s, 3H), 1.63 (s, 3H), 1.06 (s, 3H).  $^{13}\text{C NMR}$  (100 MHz,  $\text{CDCl}_3$ )  $\delta$  186.9, 150.7, 149.9, 146.5, 144.6, 138.7, 135.7, 134.2, 132.1, 129.60, 128.8, 128.6, 128.1, 126.9, 126.8, 125.6, 124.1, 121.7, 121.6, 119.7, 103.1, 55.6, 23.5, 22.2, 13.0. **HRMS (ESI)**: Calcd for  $\text{C}_{26}\text{H}_{22}\text{BrN}_3\text{O}$   $[\text{M}+\text{H}]^+$ : 472.1019; found: 472.1017.

**4-(2-(3,3-dimethyl-3*H*-indol-2-yl)phenyl)-3-methyl-1-(*p*-tolyl)-1*H*-pyrazol-5-ol (3ab)**

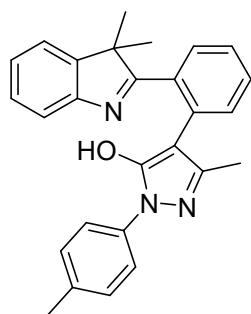

The compound prepared using  $[\text{Cp}^*\text{Rh}(\text{MeCN})_3](\text{SbF}_6)_2$  (6.6 mg, 0.008 mmol), 3,3-dimethyl-2-phenyl-3*H*-indole (44.2 mg, 0.2 mmol), 4-diazo-5-methyl-2-(*p*-tolyl)-2,4-dihydro-3*H*-pyrazol-3-one (64.2 mg, 0.3 mmol, 1.5 equiv.), and HOAc (12 mg, 0.2 mmol, 1 equiv.). After 16 h, it was cooled to room temperature and concentrated under reduced pressure. The residue was purified by silica gel column chromatography (petroleum ether/ethyl acetate = 10:1) to afford **3ab** as a yellow liquid (57.0 mg, 70%).  $^1\text{H NMR}$  (400 MHz,  $\text{CDCl}_3$ )  $\delta$  12.27 (s, 1H), 7.66 - 7.51 (m, 5H), 7.43 (dd,  $J = 9.9$ , 8.0 Hz, 2H), 7.38 - 7.27 (m, 3H), 7.20 (d,  $J = 8.2$  Hz, 2H), 2.36 (s, 3H), 2.16 (s, 3H), 1.64 (s, 3H), 1.06 (s, 3H).  $^{13}\text{C NMR}$  (100 MHz,  $\text{CDCl}_3$ )  $\delta$  188.1, 150.5, 150.2, 146.5, 144.9, 136.5, 135.2, 133.4, 133.0, 132.1, 129.8, 129.2, 128.0, 127.4, 126.7, 126.4, 121.7, 121.7, 119.7, 104.1, 55.7, 23.6, 22.4, 20.9, 13.0. **HRMS (ESI)**: Calcd for  $\text{C}_{27}\text{H}_{25}\text{N}_3\text{O}$   $[\text{M}+\text{H}]^+$ : 408.2070; found: 408.2070.

**4-(2-(3,3-dimethyl-3*H*-indol-2-yl)phenyl)-1-(4-ethylphenyl)-3-methyl-1*H*-pyrazol-5-ol (3ac)**

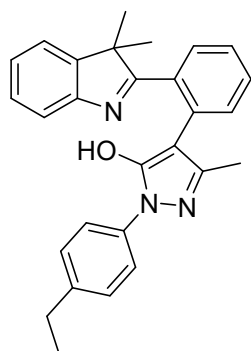

The compound prepared using  $[\text{Cp}^*\text{Rh}(\text{MeCN})_3](\text{SbF}_6)_2$  (6.6 mg, 0.008 mmol), 3,3-dimethyl-2-phenyl-3*H*-indole (44.2 mg, 0.2 mmol), 4-diazo-2-(4-ethylphenyl)-5-methyl-2,4-dihydro-3*H*-pyrazol-3-one (68.4 mg, 0.3 mmol, 1.5 equiv.), and HOAc (12 mg, 0.2 mmol, 1 equiv.). After 16 h, it was cooled to room temperature and concentrated under reduced pressure. The residue was purified by silica gel column chromatography (petroleum ether/ethyl acetate = 10:1) to afford **3ac** as a yellow liquid (56.4 mg, 67%). **<sup>1</sup>H NMR (400 MHz, CDCl<sub>3</sub>)**  $\delta$  7.61 (t,  $J$  = 9.1 Hz, 3H), 7.54 (dd,  $J$  = 7.0, 3.9 Hz, 2H), 7.43 (dd,  $J$  = 11.7, 7.7 Hz, 2H), 7.37 - 7.27 (m, 3H), 7.22 (d,  $J$  = 8.2 Hz, 2H), 2.65 (q,  $J$  = 7.5 Hz, 2H), 2.15 (s, 3H), 1.64 (s, 3H), 1.25 (d,  $J$  = 7.8 Hz, 3H), 1.06 (s, 3H). **<sup>13</sup>C NMR (100 MHz, CDCl<sub>3</sub>)**  $\delta$  187.5, 150.5, 150.2, 146.6, 144.9, 141.7, 136.6, 133.4, 133.0, 132.1, 129.8, 128.1, 128.0, 127.4, 126.7, 126.4, 121.9, 121.7, 119.7, 104.1, 55.7, 28.4, 23.6, 22.4, 15.5, 12.9. **HRMS (ESI)**: Calcd for C<sub>28</sub>H<sub>27</sub>N<sub>3</sub>O [M+H]<sup>+</sup>: 422.2227; found: 422.2227.

#### 4-(2-(3,3-dimethyl-3*H*-indol-2-yl)phenyl)-1-(4-isopropylphenyl)-3-methyl-1*H*-pyrazol-5-ol (**3ad**)

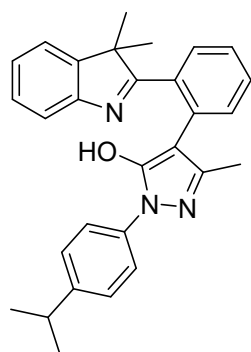

The compound prepared using  $[\text{Cp}^*\text{Rh}(\text{MeCN})_3](\text{SbF}_6)_2$  (6.6 mg, 0.008 mmol), 3,3-dimethyl-2-phenyl-3*H*-indole (44.2 mg, 0.2 mmol), 4-diazo-2-(4-isopropylphenyl)-5-methyl-2,4-dihydro-3*H*-pyrazol-3-one (72.6 mg, 0.3 mmol, 1.5 equiv.), and HOAc (12 mg, 0.2 mmol, 1 equiv.). After 16 h, it was cooled to room temperature and concentrated under reduced pressure. The residue was purified by silica gel column chromatography

(petroleum ether/ethyl acetate = 10:1) to afford **3ad** as a yellow liquid (53.9 mg, 62%). **<sup>1</sup>H NMR (400 MHz, CDCl<sub>3</sub>)** δ 7.71 - 7.57 (m, 3H), 7.57 - 7.51 (m, 2H), 7.47 - 7.39 (m, 2H), 7.34 (ddd, *J* = 19.0, 10.7, 4.4 Hz, 3H), 7.24 (d, *J* = 8.5 Hz, 2H), 2.91 (dp, *J* = 14.1, 7.0 Hz, 1H), 2.17 (d, *J* = 17.5 Hz, 3H), 1.64 (s, 3H), 1.25 (d, *J* = 6.9 Hz, 6H), 1.05 (s, 3H). **<sup>13</sup>C NMR (101 MHz, CDCl<sub>3</sub>)** δ 188.4, 150.4, 150.3, 146.6, 146.3, 144.9, 136.6, 133.5, 133.0, 132.1, 129.8, 128.1, 127.4, 126.7, 126.6, 126.4, 121.9, 121.7, 119.7, 104.1, 55.7, 33.7, 23.9, 23.6, 22.4, 12.9. **HRMS (ESI):** Calcd for C<sub>29</sub>H<sub>29</sub>N<sub>3</sub>O [M+H]<sup>+</sup>: 436.2383; found: 436.2381.

**1-(4-(*tert*-butyl)phenyl)-4-(2-(3,3-dimethyl-3*H*-indol-2-yl)phenyl)-3-methyl-1*H*-pyrazol-5-ol (3ae)**

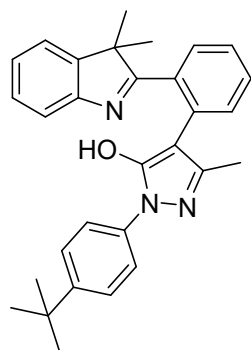

The compound prepared using [Cp\**Rh*(MeCN)<sub>3</sub>](SbF<sub>6</sub>)<sub>2</sub> (6.6 mg, 0.008 mmol), 3,3-dimethyl-2-phenyl-3*H*-indole (44.2 mg, 0.2 mmol), 2-(4-(*tert*-butyl)phenyl)-4-diazo-5-methyl-2,4-dihydro-3*H*-pyrazol-3-one (76.8 mg, 0.3 mmol, 1.5 equiv.), and HOAc (12 mg, 0.2 mmol, 1 equiv.). After 16 h, it was cooled to room temperature and concentrated under reduced pressure. The residue was purified by silica gel column chromatography (petroleum ether/ethyl acetate = 10:1) to afford **3ae** as a yellow liquid (53.0 mg, 59%). **<sup>1</sup>H NMR (400 MHz, CDCl<sub>3</sub>)** δ 7.62 (dd, *J* = 7.8, 5.7 Hz, 3H), 7.57 - 7.50 (m, 2H), 7.47 - 7.26 (m, 7H), 2.15 (s, 3H), 1.64 (s, 3H), 1.33 (s, 9H), 1.06 (s, 3H). **<sup>13</sup>C NMR (100 MHz, CDCl<sub>3</sub>)** δ 188.8, 150.4, 150.3, 148.6, 146.6, 144.9, 136.3, 133.5, 133.0, 132.1, 129.8, 128.1, 127.4, 126.7, 126.4, 125.6, 121.7, 121.5, 119.7, 104.1, 55.7, 34.4, 31.3, 23.6, 22.4, 12.9. **HRMS (ESI):** Calcd for C<sub>30</sub>H<sub>31</sub>N<sub>3</sub>O [M+H]<sup>+</sup>: 450.2540; found: 450.2540.

**4-(2-(3,3-dimethyl-3*H*-indol-2-yl)phenyl)-1-(4-methoxyphenyl)-3-methyl-1*H*-pyrazol-5-ol (3af)**

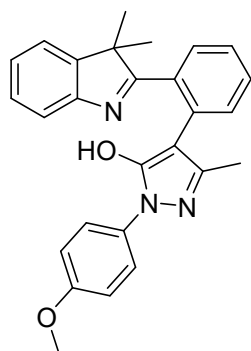

The compound prepared using  $[\text{Cp}^*\text{Rh}(\text{MeCN})_3](\text{SbF}_6)_2$  (6.6 mg, 0.008 mmol), 3,3-dimethyl-2-phenyl-3*H*-indole (44.2 mg, 0.2 mmol), 4-diazo-2-(4-methoxyphenyl)-5-methyl-2,4-dihydro-3*H*-pyrazol-3-one (69.0 mg, 0.3 mmol, 1.5 equiv.), and HOAc (12 mg, 0.2 mmol, 1 equiv.). After 16 h, it was cooled to room temperature and concentrated under reduced pressure. The residue was purified by silica gel column chromatography (petroleum ether/ethyl acetate = 4:1) to afford **3af** as a yellow liquid (53.3 mg, 63%).

**<sup>1</sup>H NMR (400 MHz, CDCl<sub>3</sub>)** δ 7.63 - 7.57 (m, 3H), 7.54 (t, *J* = 6.6 Hz, 2H), 7.42 (dd, *J* = 11.8, 7.6 Hz, 2H), 7.37 - 7.26 (m, 3H), 6.92 (d, *J* = 9.0 Hz, 2H), 3.82 (s, 3H), 2.15 (s, 3H), 1.64 (s, 3H), 1.06 (s, 3H). **<sup>13</sup>C NMR (100 MHz, CDCl<sub>3</sub>)** δ 187.7, 157.6, 150.3, 150.2, 146.4, 144.9, 133.4, 133.0, 132.1, 132.1, 129.8, 128.1, 127.4, 126.7, 126.4, 123.6, 121.7, 119.6, 113.8, 103.9, 55.7, 55.4, 23.6, 22.4, 12.9. **HRMS (ESI):** Calcd for C<sub>27</sub>H<sub>25</sub>N<sub>3</sub>O<sub>2</sub> [M+H]<sup>+</sup>: 424.2020; found: 424.2020.

#### 4-(4-(2-(3,3-dimethyl-3*H*-indol-2-yl)phenyl)-5-hydroxy-3-methyl-1*H*-pyrazol-1-yl)benzonitrile (**3ag**)

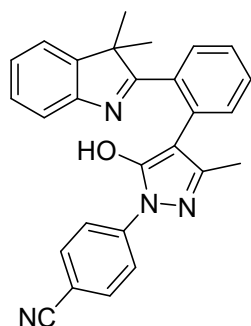

The compound prepared using  $[\text{Cp}^*\text{Rh}(\text{MeCN})_3](\text{SbF}_6)_2$  (6.6 mg, 0.008 mmol), 3,3-dimethyl-2-phenyl-3*H*-indole (44.2 mg, 0.2 mmol), 4-(4-diazo-3-methyl-5-oxo-4,5-dihydro-1*H*-pyrazol-1-yl)benzonitrile (67.5 mg, 0.3 mmol, 1.5 equiv.), and HOAc (12 mg, 0.2 mmol, 1 equiv.). After 16 h, it was cooled to room temperature and concentrated under reduced pressure. The residue was purified by silica gel column chromatography (petroleum ether/ethyl acetate = 4:1) to afford **3ag** as a pale yellow solid (44.3 mg, 53%). m.p. 196-198 °C.

**<sup>1</sup>H NMR (400 MHz, CDCl<sub>3</sub>)** δ 8.08 (d, *J* = 8.7 Hz, 2H), 7.67 (d, *J* = 8.7 Hz, 2H), 7.57 (dt, *J* = 7.5, 6.1 Hz, 3H), 7.47 (t, *J* = 7.5 Hz, 1H), 7.41 - 7.27 (m, 4H), 2.15 (s, 3H), 1.66 (s, 3H), 1.12 (s, 3H). **<sup>13</sup>C NMR (100 MHz, CDCl<sub>3</sub>)** δ 187.5, 151.8, 149.6, 148.7, 144.8, 142.6, 133.2, 132.9, 132.8, 131.4, 130.1, 128.2, 127.5, 126.9, 126.8, 121.8, 120.4, 119.4, 118.9, 107.8, 104.9, 55.7, 23.5, 22.5, 13.1. **HRMS (ESI):** Calcd for C<sub>27</sub>H<sub>22</sub>N<sub>4</sub>O [M+H]<sup>+</sup>: 419.1866; found: 419.1866

**1-(4-chlorophenyl)-4-(2-(3,3-dimethyl-3*H*-indol-2-yl)phenyl)-3-methyl-1*H*-pyrazol-5-ol (3ah)**

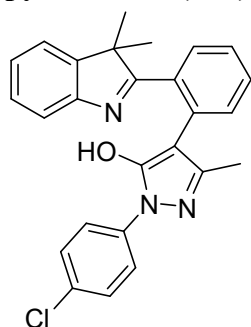

The compound prepared using [Cp\**Rh*(MeCN)<sub>3</sub>](SbF<sub>6</sub>)<sub>2</sub> (6.6 mg, 0.008 mmol), 3,3-dimethyl-2-phenyl-3*H*-indole (44.2 mg, 0.2 mmol), 2-(4-chlorophenyl)-4-diazo-5-methyl-2,4-dihydro-3*H*-pyrazol-3-one (70.2 mg, 0.3 mmol, 1.5 equiv.), and HOAc (12 mg, 0.2 mmol, 1 equiv.). After 16 h, it was cooled to room temperature and concentrated under reduced pressure. The residue was purified by silica gel column chromatography (petroleum ether/ethyl acetate = 10:1) to afford **3ah** as a yellow liquid (39.3 mg, 46%).

**<sup>1</sup>H NMR (400 MHz, CDCl<sub>3</sub>)** δ 12.69 (s, 1H), 7.77 (d, *J* = 8.8 Hz, 2H), 7.55 (t, *J* = 8.3 Hz, 3H), 7.45 (t, *J* = 7.5 Hz, 1H), 7.40 (d, *J* = 7.7 Hz, 1H), 7.38 - 7.27 (m, 5H), 2.14 (s, 3H), 1.66 (s, 3H), 1.06 (s, 3H). **<sup>13</sup>C NMR (100 MHz, CDCl<sub>3</sub>)** δ 184.6, 150.9, 150.0, 147.3, 144.9, 137.6, 133.3, 133.1, 131.9, 130.7, 129.9, 128.7, 128.1, 127.4, 126.8, 126.6, 122.4, 121.8, 119.6, 104.4, 55.7, 23.7, 22.3, 13.0. **HRMS (ESI):** Calcd for C<sub>26</sub>H<sub>22</sub>ClN<sub>3</sub>O [M+H]<sup>+</sup>: 428.1524; found: 428.1524.

**1-(4-bromophenyl)-4-(2-(3,3-dimethyl-3*H*-indol-2-yl)phenyl)-3-methyl-1*H*-pyrazol-5-ol (3ai)**

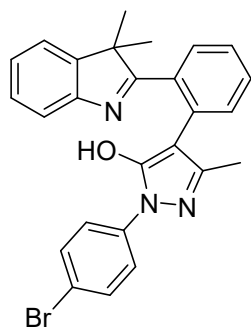

The compound prepared using  $[\text{Cp}^*\text{Rh}(\text{MeCN})_3](\text{SbF}_6)_2$  (6.6 mg, 0.008 mmol), 3,3-dimethyl-2-phenyl-3*H*-indole (44.2 mg, 0.2 mmol), 2-(4-bromophenyl)-4-diazo-5-methyl-2,4-dihydro-3*H*-pyrazol-3-one (83.4 mg, 0.3 mmol, 1.5 equiv.), and HOAc (12 mg, 0.2 mmol, 1 equiv.). After 16 h, it was cooled to room temperature and concentrated under reduced pressure. The residue was purified by silica gel column chromatography (petroleum ether/ethyl acetate = 10:1) to afford **3ai** as a yellow liquid (37.7 mg, 40%).  $^1\text{H NMR}$  (400 MHz,  $\text{CDCl}_3$ )  $\delta$  12.72 (s, 1H), 7.73 (d,  $J = 8.8$  Hz, 2H), 7.60 - 7.48 (m, 5H), 7.45 (t,  $J = 7.5$  Hz, 1H), 7.40 (d,  $J = 7.7$  Hz, 1H), 7.37 - 7.26 (m, 3H), 2.14 (s, 3H), 1.66 (s, 3H), 1.06 (s, 3H).  $^{13}\text{C NMR}$  (100 MHz,  $\text{CDCl}_3$ )  $\delta$  188.0, 150.9, 150.0, 147.3, 144.9, 138.1, 133.3, 133.0, 131.8, 131.7, 129.9, 128.1, 127.4, 126.8, 126.6, 122.7, 121.8, 119.6, 118.5, 104.5, 55.7, 23.7, 22.5, 13.0. **HRMS (ESI)**: Calcd for  $\text{C}_{26}\text{H}_{22}\text{BrN}_3\text{O}$   $[\text{M}+\text{H}]^+$ : 472.1019; found: 472.1019.

#### 4-(2-(3,3-dimethyl-3*H*-indol-2-yl)phenyl)-1-(4-iodophenyl)-3-methyl-1*H*-pyrazol-5-ol (**3aj**)

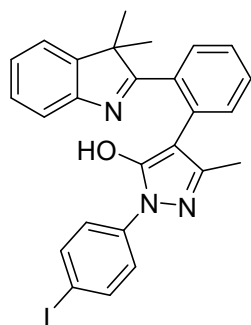

The compound prepared using  $[\text{Cp}^*\text{Rh}(\text{MeCN})_3](\text{SbF}_6)_2$  (6.6 mg, 0.008 mmol), 3,3-dimethyl-2-phenyl-3*H*-indole (44.2 mg, 0.2 mmol), 4-diazo-2-(4-iodophenyl)-5-methyl-2,4-dihydro-3*H*-pyrazol-3-one (97.8 mg, 0.3 mmol, 1.5 equiv.), and HOAc (12 mg, 0.2 mmol, 1 equiv.). After 16 h, it was cooled to room temperature and concentrated under reduced pressure. The residue was purified by silica gel column chromatography (petroleum ether/ethyl acetate = 10:1) to afford **3aj** as a pale yellow solid (51.9 mg, 50%). m.p. 168-170 °C.

$^1\text{H NMR}$  (400 MHz,  $\text{CDCl}_3$ )  $\delta$  12.67 (s, 1H), 7.70 (d,  $J = 8.8$  Hz, 2H), 7.61 (d,  $J = 8.8$



Hz, 2H), 7.55 (t,  $J = 8.9$  Hz, 3H), 7.44 (t,  $J = 7.4$  Hz, 1H), 7.39 (d,  $J = 7.7$  Hz, 1H), 7.37 - 7.26 (m, 3H), 2.14 (s, 3H), 1.66 (s, 3H), 1.06 (s, 3H).  $^{13}\text{C}$  NMR (100 MHz,  $\text{CDCl}_3$ )  $\delta$  188.5, 150.9, 149.9, 147.4, 144.8, 138.8, 137.6, 133.3, 133.0, 131.8, 129.9, 128.1, 127.4, 126.8, 126.6, 122.9, 121.8, 119.6, 104.5, 89.5, 55.7, 23.6, 22.3, 13.1. HRMS (ESI): Calcd for  $\text{C}_{26}\text{H}_{22}\text{IN}_3\text{O}$   $[\text{M}+\text{H}]^+$ : 520.0880; found: 520.0879.

**4-(2-(3,3-dimethyl-3*H*-indol-2-yl)phenyl)-3-methyl-1-(*o*-tolyl)-1*H*-pyrazol-5-ol (3ak)**

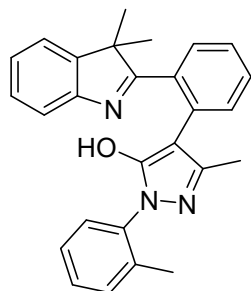

The compound prepared using  $[\text{Cp}^*\text{Rh}(\text{MeCN})_3](\text{SbF}_6)_2$  (6.6 mg, 0.008 mmol), 3,3-dimethyl-2-phenyl-3*H*-indole (44.2 mg, 0.2 mmol), 4-diazo-5-methyl-2-(*o*-tolyl)-2,4-dihydro-3*H*-pyrazol-3-one (64.2 mg, 0.3 mmol, 1.5 equiv.), and HOAc (12 mg, 0.2 mmol, 1 equiv.). After 16 h, it was cooled to room temperature and concentrated under reduced pressure. The residue was purified by silica gel column chromatography (petroleum ether/ethyl acetate = 10:1) to afford **3ak** as a pale yellow liquid (63.5 mg, 78%).

$^1\text{H}$  NMR (400 MHz,  $\text{CDCl}_3$ )  $\delta$  7.55 (dd,  $J = 12.4, 4.4$  Hz, 2H), 7.51 - 7.40 (m, 3H), 7.38 - 7.30 (m, 3H), 7.25 (dt,  $J = 14.9, 5.2$  Hz, 4H), 2.18 (s, 3H), 1.82 (s, 3H), 1.62 (s, 3H), 1.06 (s, 3H).  $^{13}\text{C}$  NMR (100 MHz,  $\text{CDCl}_3$ )  $\delta$  188.7, 150.6, 150.4, 146.4, 144.9, 137.3, 135.7, 133.6, 132.8, 132.1, 130.4, 129.6, 128.5, 127.9, 127.8, 127.4, 126.7, 126.3, 126.2, 121.6, 119.9, 102.5, 55.8, 23.6, 22.1, 17.2, 13.0. HRMS (ESI): Calcd for  $\text{C}_{27}\text{H}_{25}\text{N}_3\text{O}$   $[\text{M}+\text{H}]^+$ : 408.2070; found: 408.2070.

**1-(2-chlorophenyl)-4-(2-(3,3-dimethyl-3*H*-indol-2-yl)phenyl)-3-methyl-1*H*-pyrazol-5-ol (3al)**

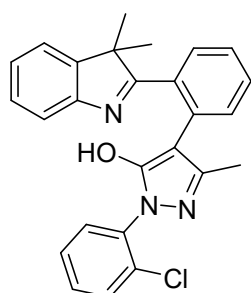

The compound prepared using [Cp\*Rh(MeCN)<sub>3</sub>](SbF<sub>6</sub>)<sub>2</sub> (6.6 mg, 0.008 mmol), 3,3-dimethyl-2-phenyl-3*H*-indole (44.2 mg, 0.2 mmol), 2-(2-chlorophenyl)-4-diazo-5-methyl-2,4-dihydro-3*H*-pyrazol-3-one (70.2 mg, 0.3 mmol, 1.5 equiv.), and HOAc (12 mg, 0.2 mmol, 1 equiv.). After 16 h, it was cooled to room temperature and concentrated under reduced pressure. The residue was purified by silica gel column chromatography (petroleum ether/ethyl acetate = 10:1) to afford **3al** as a white solid (64.1 mg, 75%). m.p. 195-197 °C.

**<sup>1</sup>H NMR (400 MHz, CDCl<sub>3</sub>)** δ 11.81 (s, 1H), 7.61 (d, *J* = 7.6 Hz, 1H), 7.55 (t, *J* = 7.4 Hz, 1H), 7.49 - 7.39 (m, 5H), 7.39 - 7.27 (m, 5H), 2.19 (s, 3H), 1.60 (s, 3H), 1.06 (s, 3H). **<sup>13</sup>C NMR (100 MHz, CDCl<sub>3</sub>)** δ 188.7, 151.2, 150.5, 147.4, 144.8, 136.1, 133.7, 132.7, 132.1, 131.8, 129.8, 129.7, 129.6, 129.6, 127.7, 127.6, 127.2, 126.6, 126.4, 121.5, 120.4, 102.9, 55.8, 23.7, 22.1, 13.1. **HRMS (ESI):** Calcd for C<sub>26</sub>H<sub>22</sub>ClN<sub>3</sub>O [M+H]<sup>+</sup>: 428.1524; found: 428.1524.

#### 4-(2-(3,3-dimethyl-3*H*-indol-2-yl)phenyl)-3-methyl-1-(*m*-tolyl)-1*H*-pyrazol-5-ol (**3am**)

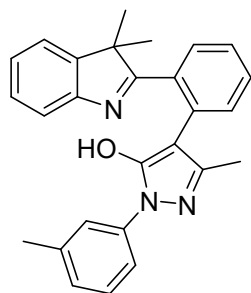

The compound prepared using [Cp\*Rh(MeCN)<sub>3</sub>](SbF<sub>6</sub>)<sub>2</sub> (6.6 mg, 0.008 mmol), 3,3-dimethyl-2-phenyl-3*H*-indole (44.2 mg, 0.2 mmol), 4-diazo-5-methyl-2-(*m*-tolyl)-2,4-dihydro-3*H*-pyrazol-3-one (64.2 mg, 0.3 mmol, 1.5 equiv.), and HOAc (12 mg, 0.2 mmol, 1 equiv.). After 16 h, it was cooled to room temperature and concentrated under reduced pressure. The residue was purified by silica gel column chromatography (petroleum ether/ethyl acetate = 10:1) to afford **3am** as a yellow liquid (40.7 mg, 50%). **<sup>1</sup>H NMR (400 MHz, CDCl<sub>3</sub>)** δ 12.38 (s, 1H), 7.57 (td, *J* = 13.3, 7.0 Hz, 5H), 7.43 (dd, *J* = 11.4, 7.7 Hz, 2H), 7.38 - 7.27 (m, 4H), 7.03 (d, *J* = 7.5 Hz, 1H), 2.38 (s, 3H), 2.16 (s, 3H), 1.65 (s, 3H), 1.06 (s, 3H). **<sup>13</sup>C NMR (100 MHz, CDCl<sub>3</sub>)** δ 188.1, 150.6, 150.2, 146.7, 144.9, 138.8, 138.5, 133.5, 133.1, 132.1, 129.8, 128.4, 128.0, 127.4, 126.7, 126.4, 126.4, 122.5, 121.7, 119.7, 118.9, 104.2, 55.7, 23.6, 22.3, 21.4, 13.0. **HRMS (ESI):** Calcd for C<sub>27</sub>H<sub>25</sub>N<sub>3</sub>O [M+H]<sup>+</sup>: 408.2070; found: 408.2070.

**4-(2-(3,3-dimethyl-3*H*-indol-2-yl)phenyl)-3-methyl-1-(naphthalen-2-yl)-1*H*-pyrazol-5-ol (3an)**

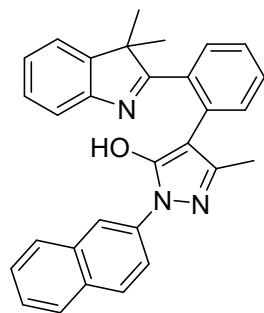

The compound prepared using  $[\text{Cp}^*\text{Rh}(\text{MeCN})_3](\text{SbF}_6)_2$  (6.6 mg, 0.008 mmol), 3,3-dimethyl-2-phenyl-3*H*-indole (44.2 mg, 0.2 mmol), 4-diazo-5-methyl-2-(naphthalen-2-yl)-2,4-dihydro-3*H*-pyrazol-3-one (75.0 mg, 0.3 mmol, 1.5 equiv.), and HOAc (12 mg, 0.2 mmol, 1 equiv.). After 16 h, it was cooled to room temperature and concentrated under reduced pressure. The residue was purified by silica gel column chromatography (petroleum ether/ethyl acetate = 10:1) to afford **3an** as a white solid (53.2 mg, 60%). m.p. 170-172 °C.

**<sup>1</sup>H NMR (400 MHz, CDCl<sub>3</sub>)** δ 12.63 (s, 1H), 8.25 (s, 1H), 8.03 (d, *J* = 8.9 Hz, 1H), 7.91 - 7.81 (m, 3H), 7.64 - 7.54 (m, 3H), 7.47 (dd, *J* = 17.5, 7.4 Hz, 4H), 7.36 - 7.27 (m, 3H), 2.22 (s, 3H), 1.66 (s, 3H), 1.09 (s, 3H). **<sup>13</sup>C NMR (100 MHz, CDCl<sub>3</sub>)** δ 188.1, 151.0, 150.1, 147.1, 144.8, 136.6, 133.5, 133.0, 132.0, 131.3, 129.8, 128.4, 128.1, 128.1, 127.5, 127.4, 126.7, 126.5, 126.2, 125.4, 121.7, 120.9, 119.6, 118.9, 104.4, 55.7, 23.6, 22.3, 13.1. **HRMS (ESI):** Calcd for C<sub>30</sub>H<sub>25</sub>N<sub>3</sub>O [M+H]<sup>+</sup>: 444.2070; found: 444.2070.

**4-(2-(3,3-dimethyl-3*H*-indol-2-yl)phenyl)-3-ethyl-1-phenyl-1*H*-pyrazol-5-ol (3ao)**

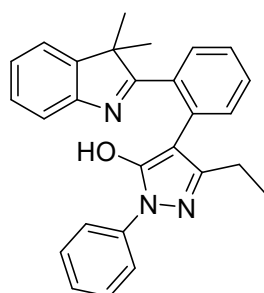

The compound prepared using  $[\text{Cp}^*\text{Rh}(\text{MeCN})_3](\text{SbF}_6)_2$  (6.6 mg, 0.008 mmol), 3,3-dimethyl-2-phenyl-3*H*-indole (44.2 mg, 0.2 mmol), 4-diazo-5-ethyl-2-phenyl-2,4-dihydro-3*H*-pyrazol-3-one (64.2 mg, 0.3 mmol, 1.5 equiv.), and HOAc (12 mg, 0.2 mmol, 1 equiv.). After 16 h, it was cooled to room temperature and concentrated under reduced pressure. The residue was purified by silica gel column chromatography

(petroleum ether/ethyl acetate = 10:1) to afford **3ao** as a yellow liquid (52.9 mg, 65%). <sup>1</sup>H NMR (400 MHz, CDCl<sub>3</sub>) δ 12.78 (s, 1H), 7.82 (d, *J* = 7.7 Hz, 2H), 7.65 – 7.57 (m, 2H), 7.57 – 7.51 (m, 1H), 7.47 – 7.28 (m, 7H), 7.21 (t, *J* = 7.4 Hz, 1H), 2.62 (qd, *J* = 7.5, 3.4 Hz, 2H), 1.69 (s, 3H), 1.28 (s, 3H), 1.11 (d, *J* = 3.4 Hz, 3H). <sup>13</sup>C NMR (100 MHz, CDCl<sub>3</sub>) δ 187.7, 152.2, 150.7, 150.0, 144.9, 139.1, 133.2, 132.3, 129.8, 128.60, 128.0, 127.4, 126.7, 126.3, 125.4, 124.4, 123.9, 121.6, 119.7, 103.3, 55.7, 23.9, 22.6, 20.8, 13.3. **HRMS (ESI)**: Calcd for C<sub>27</sub>H<sub>25</sub>N<sub>3</sub>O [M+H]<sup>+</sup>: 408.2070; found: 408.2070.

**4-(2-(3,3-dimethyl-3H-indol-2-yl)phenyl)-3-isopropyl-1-phenyl-1H-pyrazol-5-ol (3ap)**

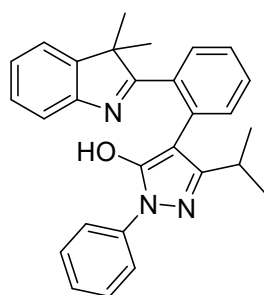

The compound prepared using [Cp\*Rh(MeCN)<sub>3</sub>](SbF<sub>6</sub>)<sub>2</sub> (6.6 mg, 0.008 mmol), 3,3-dimethyl-2-phenyl-3*H*-indole (44.2 mg, 0.2 mmol), 4-diazo-5-isopropyl-2-phenyl-2,4-dihydro-3*H*-pyrazol-3-one (68.4 mg, 0.3 mmol, 1.5 equiv.), and HOAc (12 mg, 0.2 mmol, 1 equiv.). After 16 h, it was cooled to room temperature and concentrated under reduced pressure. The residue was purified by silica gel column chromatography (petroleum ether/ethyl acetate = 10:1) to afford **3ap** as a yellow liquid (61.5 mg, 73%). <sup>1</sup>H NMR (400 MHz, CDCl<sub>3</sub>) δ 12.78 (s, 1H), 7.86 (d, *J* = 7.9 Hz, 2H), 7.62 (d, *J* = 7.1 Hz, 2H), 7.55 (t, *J* = 7.4 Hz, 1H), 7.47 – 7.36 (m, 5H), 7.34 (d, *J* = 7.6 Hz, 2H), 7.21 (t, *J* = 7.2 Hz, 1H), 2.97 (dd, *J* = 13.1, 6.4 Hz, 1H), 1.72 (s, 3H), 1.42 (d, *J* = 6.5 Hz, 3H), 1.15 (s, 3H), 1.02 (d, *J* = 6.3 Hz, 3H). <sup>13</sup>C NMR (100 MHz, CDCl<sub>3</sub>) δ 187.5, 155.8, 150.4, 150.1, 145.0, 139.3, 133.5, 132.6, 129.7, 128.58, 128.0, 127.5, 126.8, 126.3, 125.3, 121.7, 121.6, 119.7, 103.0, 55.7, 31.5, 23.0, 22.7, 22.6, 14.1. **HRMS (ESI)**: Calcd for C<sub>28</sub>H<sub>27</sub>N<sub>3</sub>O [M+H]<sup>+</sup>: 422.2227; found: 422.2226.

## 6. References

1. Gao, J.; Luo, K.; Wei, X.; Wang, H.; Liu, H.; Zhou, Z. Rh(III)-Catalyzed Successive C-H Activations of 2-Phenyl-3*H*-indoles and Cyclization Cascades to Construct Highly Fused Indole Heteropolycycles. *Org. Lett.* **2023**, *25*, 3341-3346.
2. F. Fang, S. Hu, C. Li, Q. Wang, R. Wang, X. Han, Y. Zhou, H. Liu, Catalytic System-

Controlled Divergent Reaction Strategies for the Construction of Diversified Spiropyrazolone Skeletons from Pyrazolidinones and Diazopyrazolones, *Angew. Chem. Int. Ed.* **2021**, *60*, 21327–21333.

## 7. Copies of $^1\text{H}$ , $^{13}\text{C}$ , and $^{19}\text{F}$ NMR of products

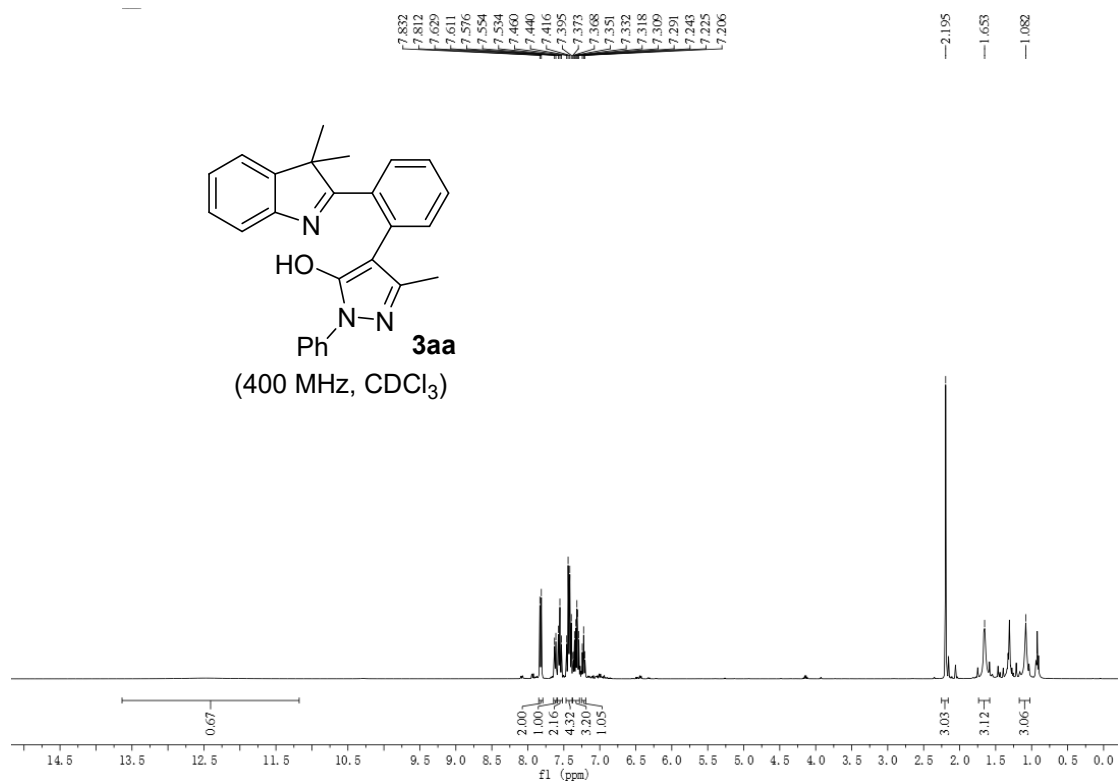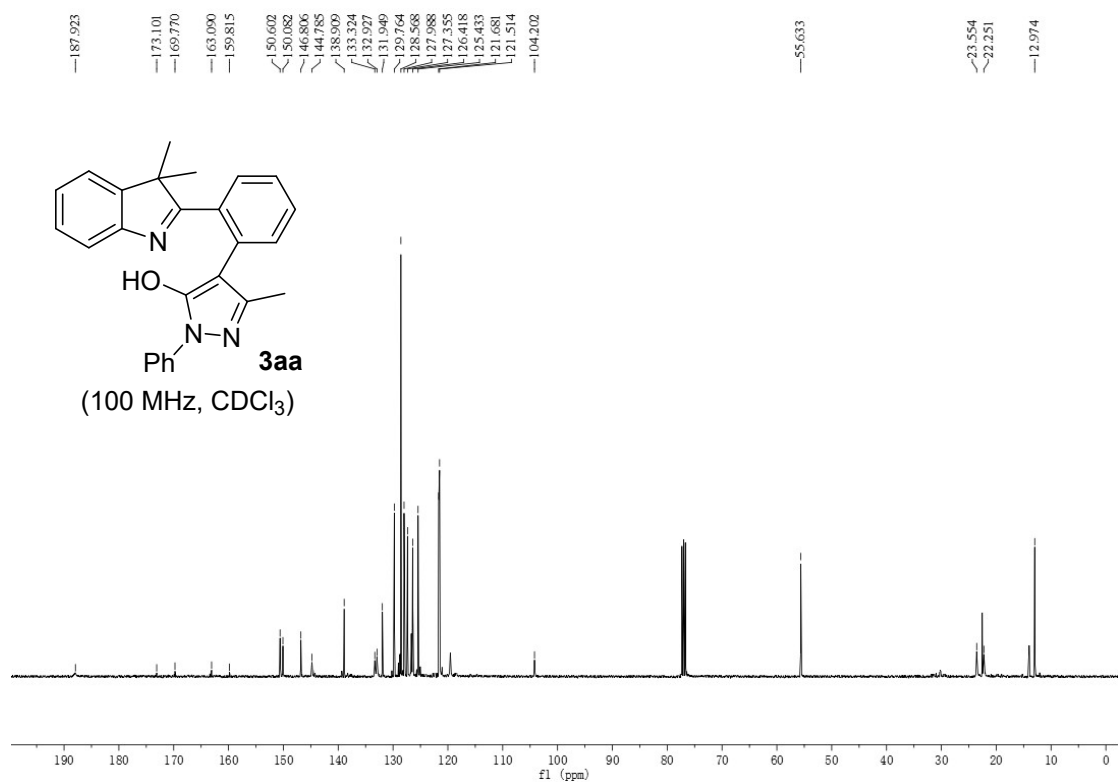

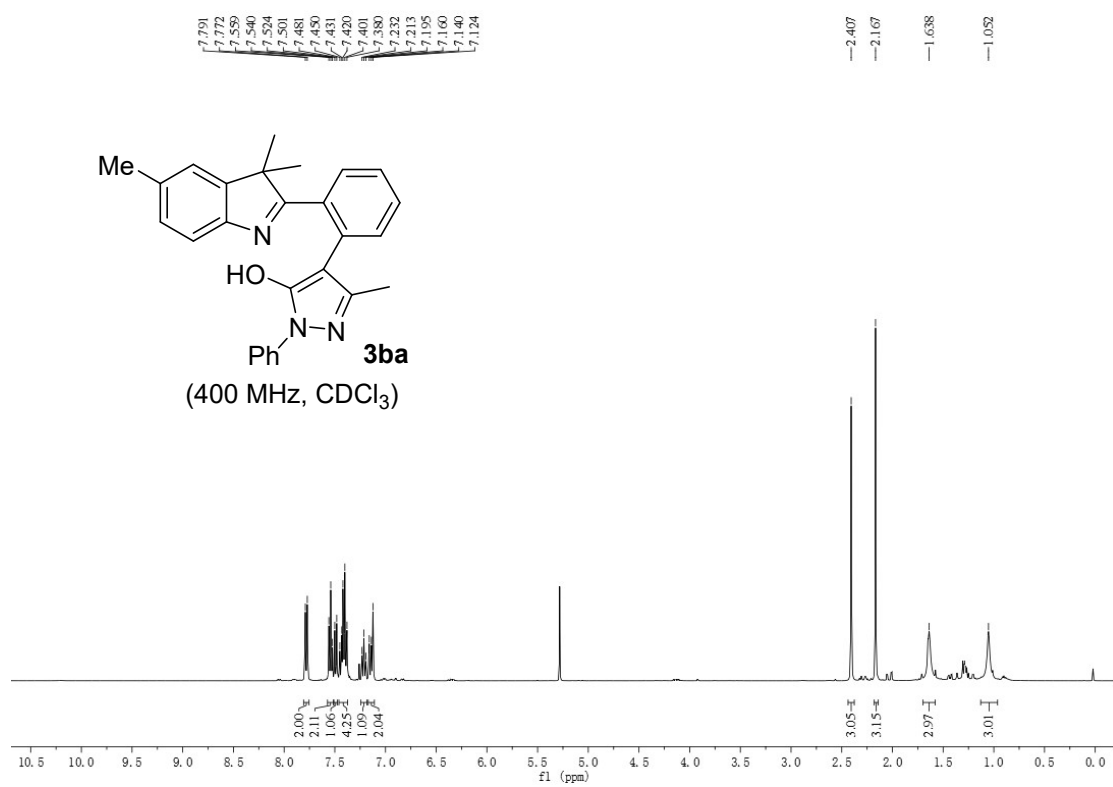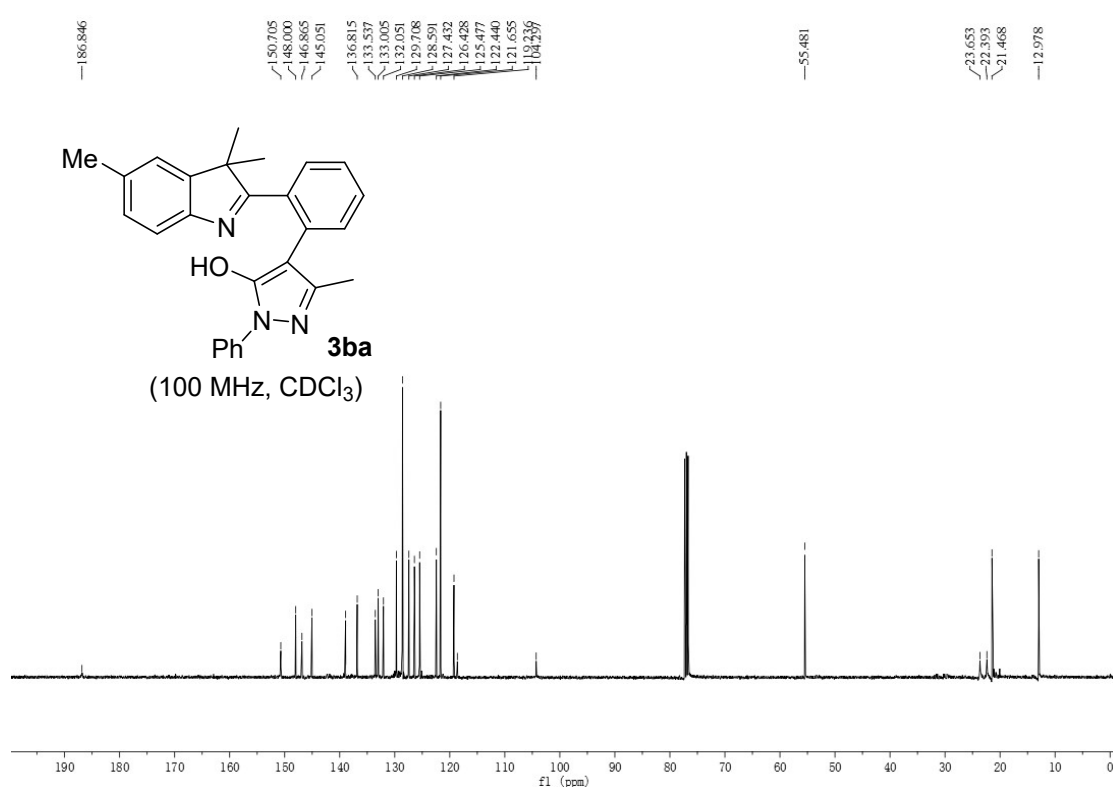

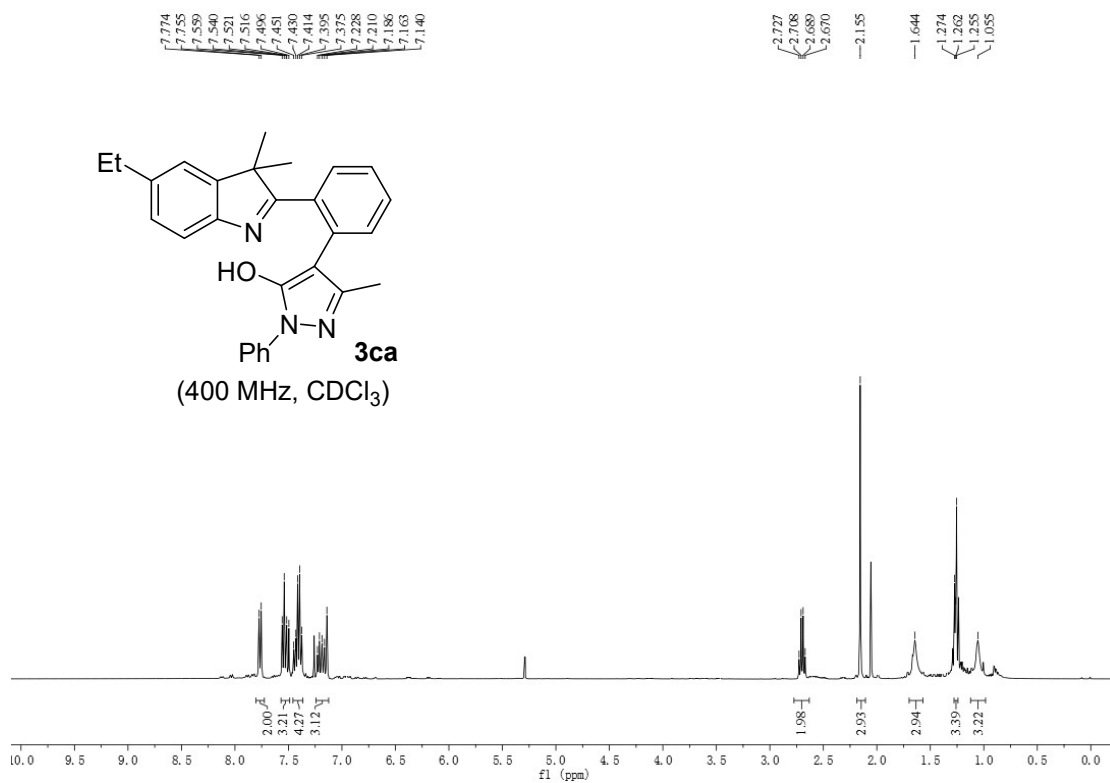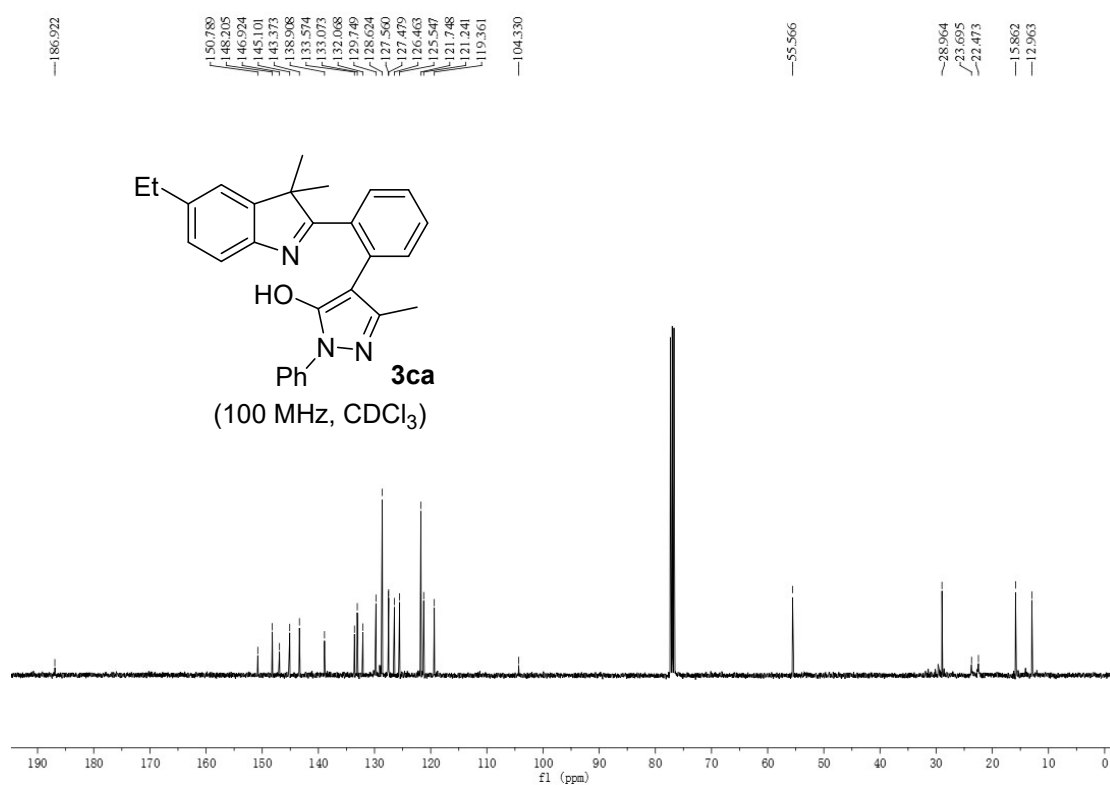



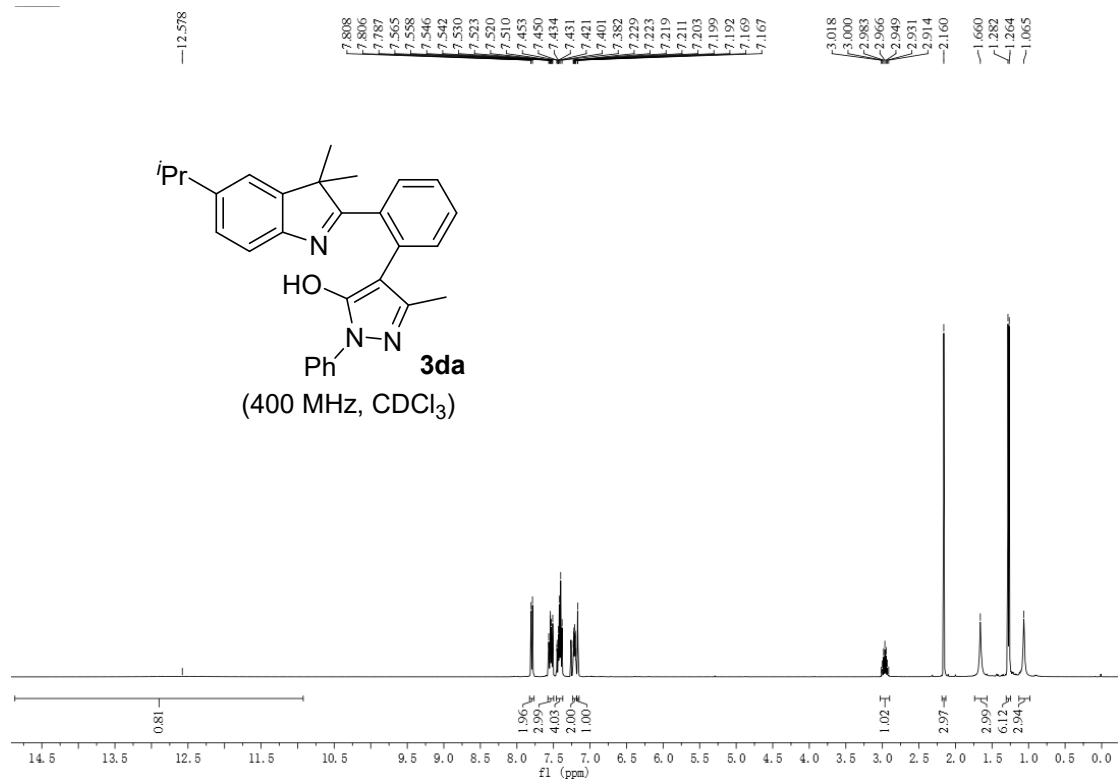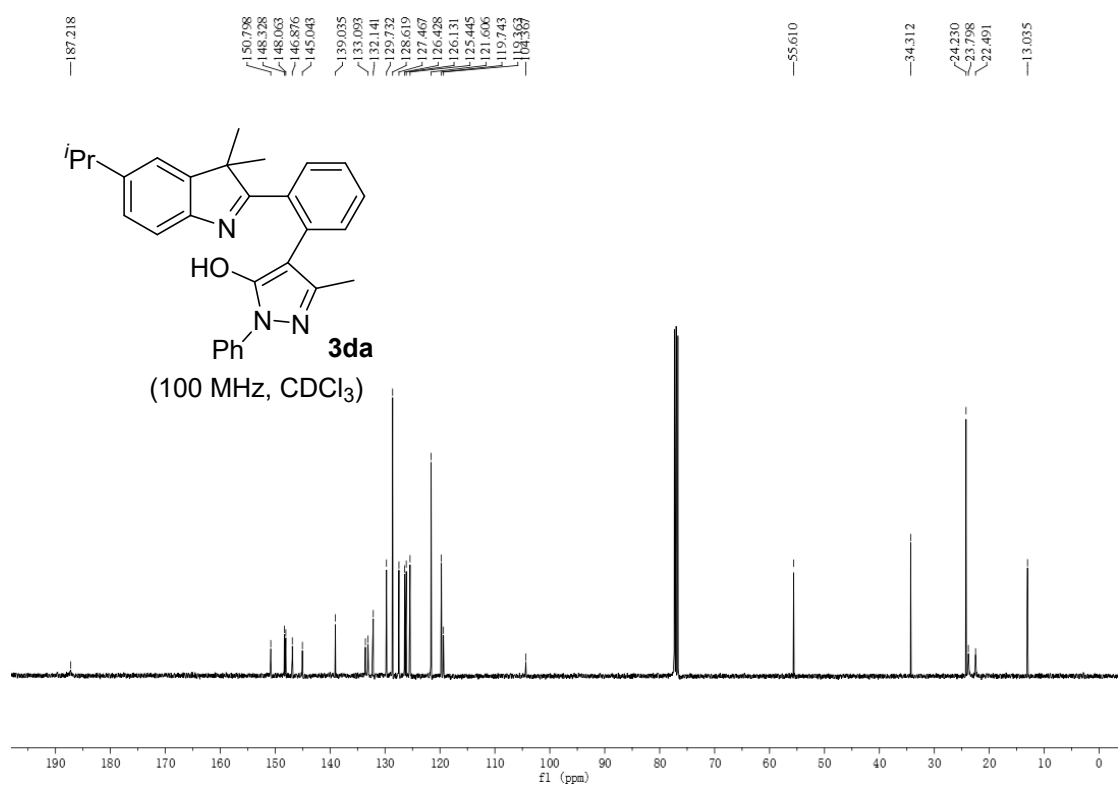

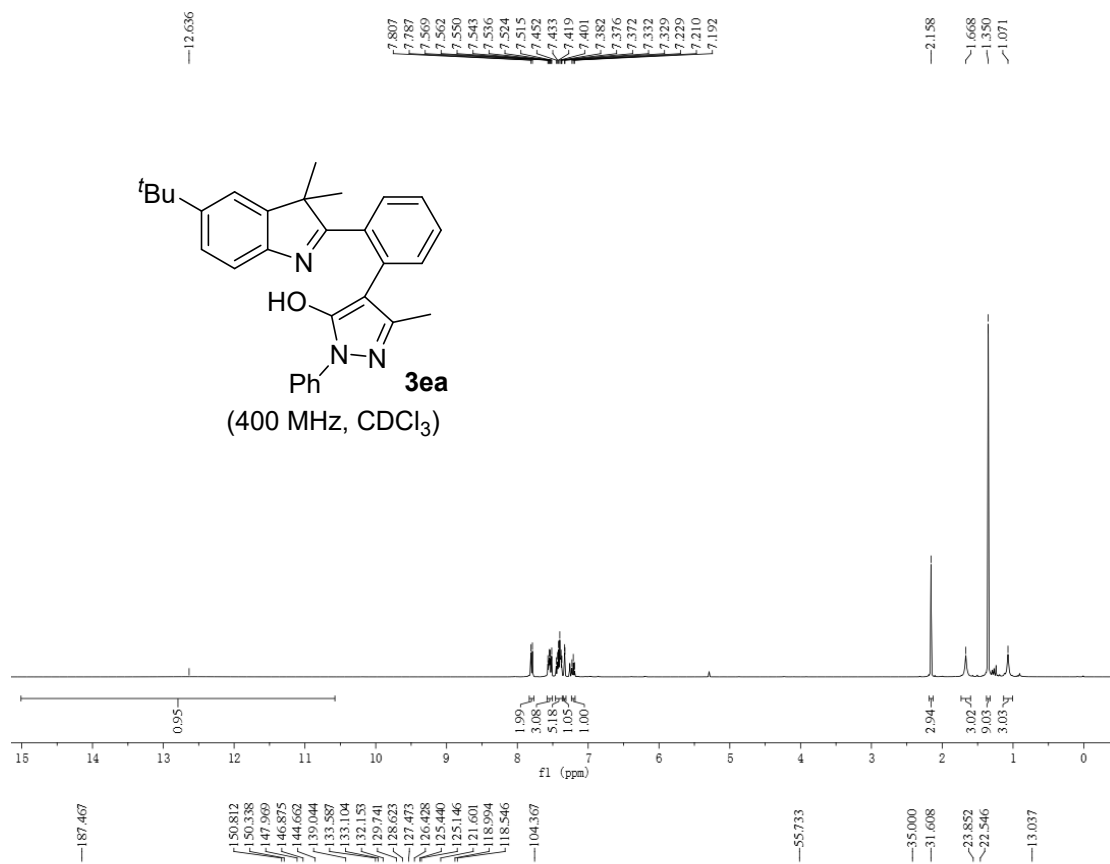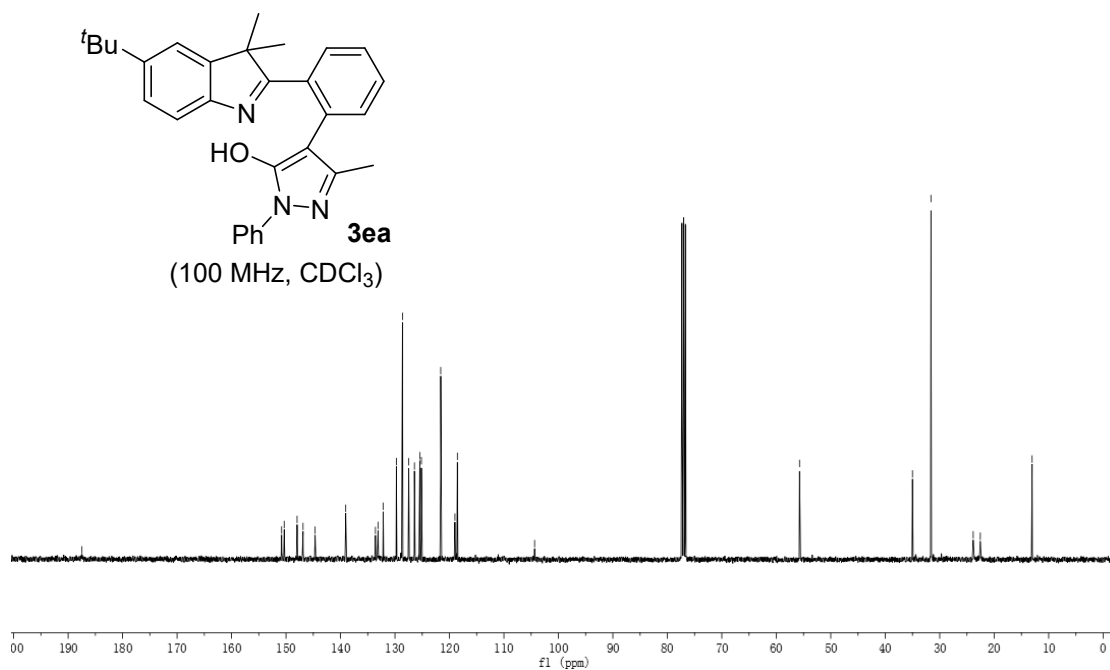

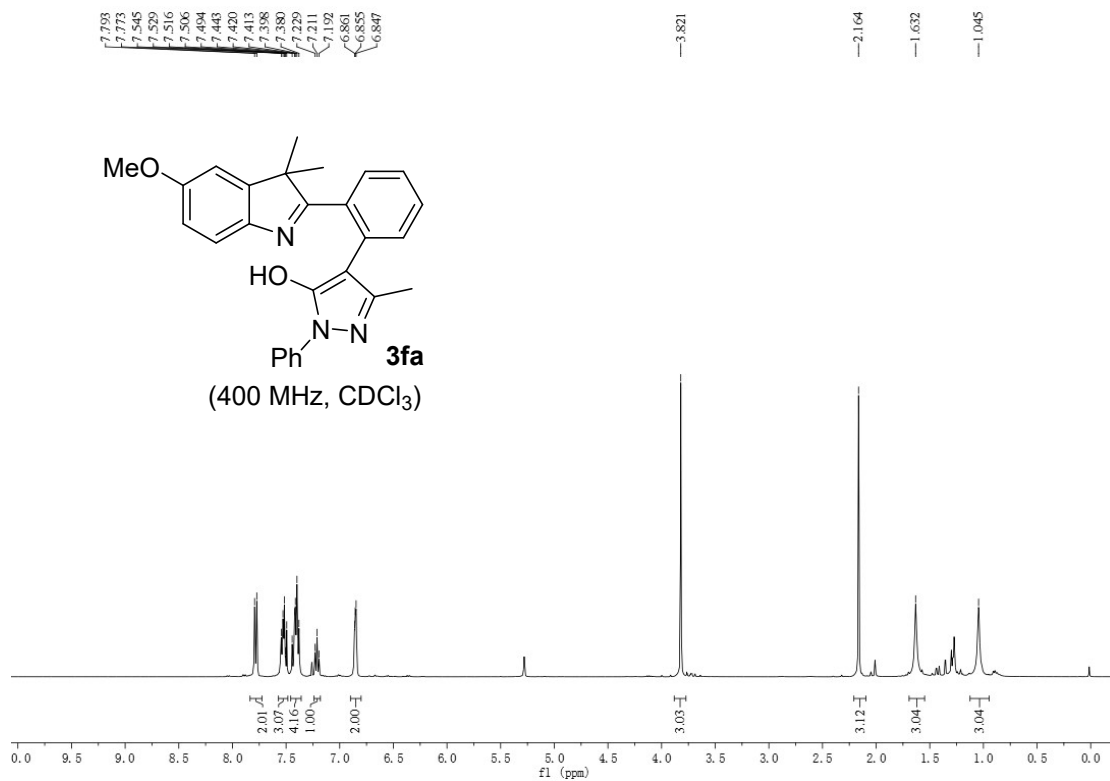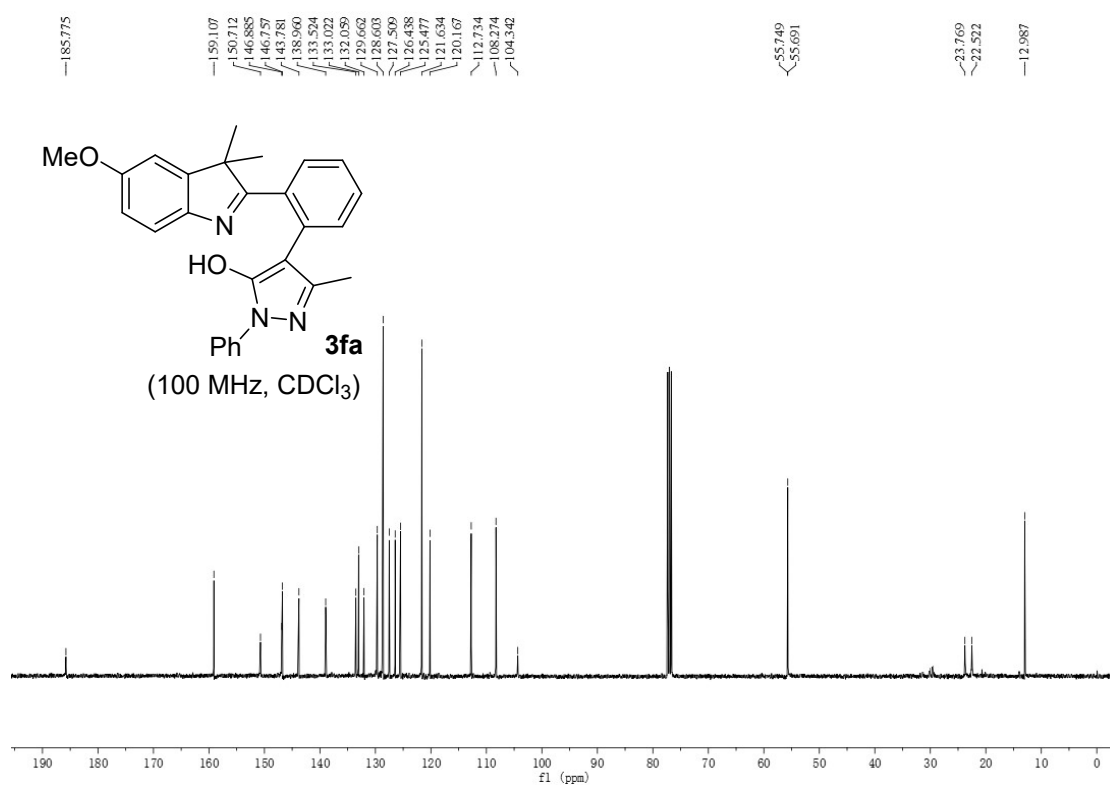

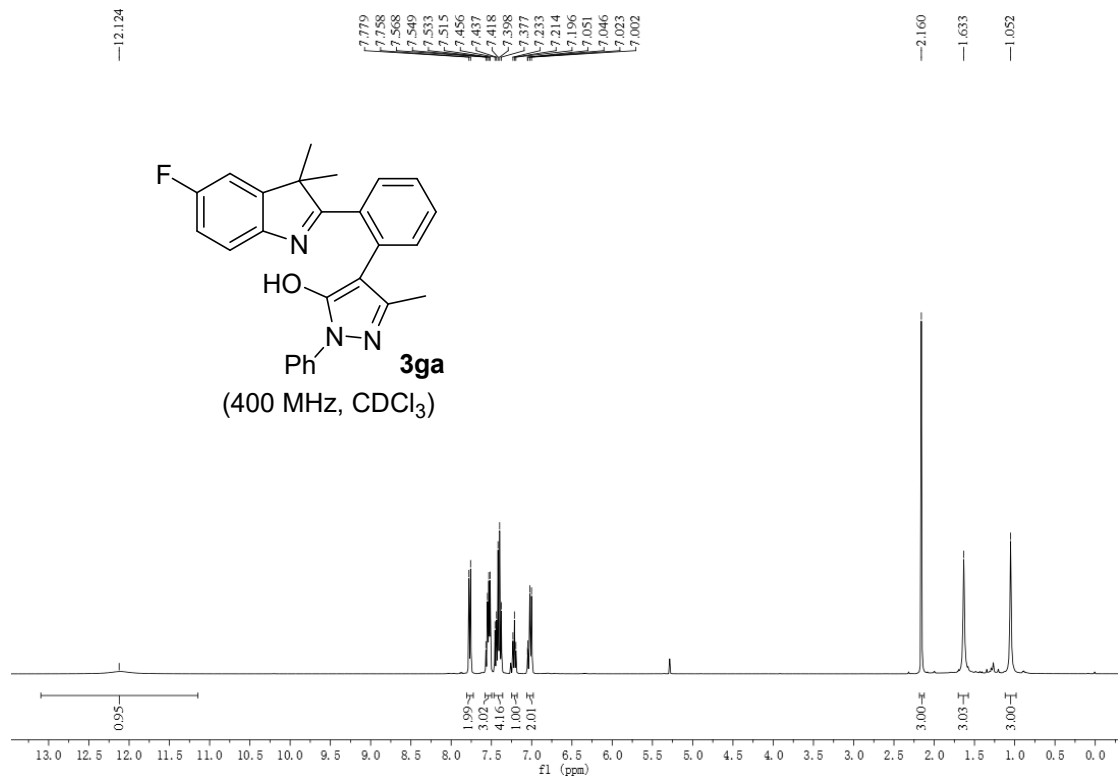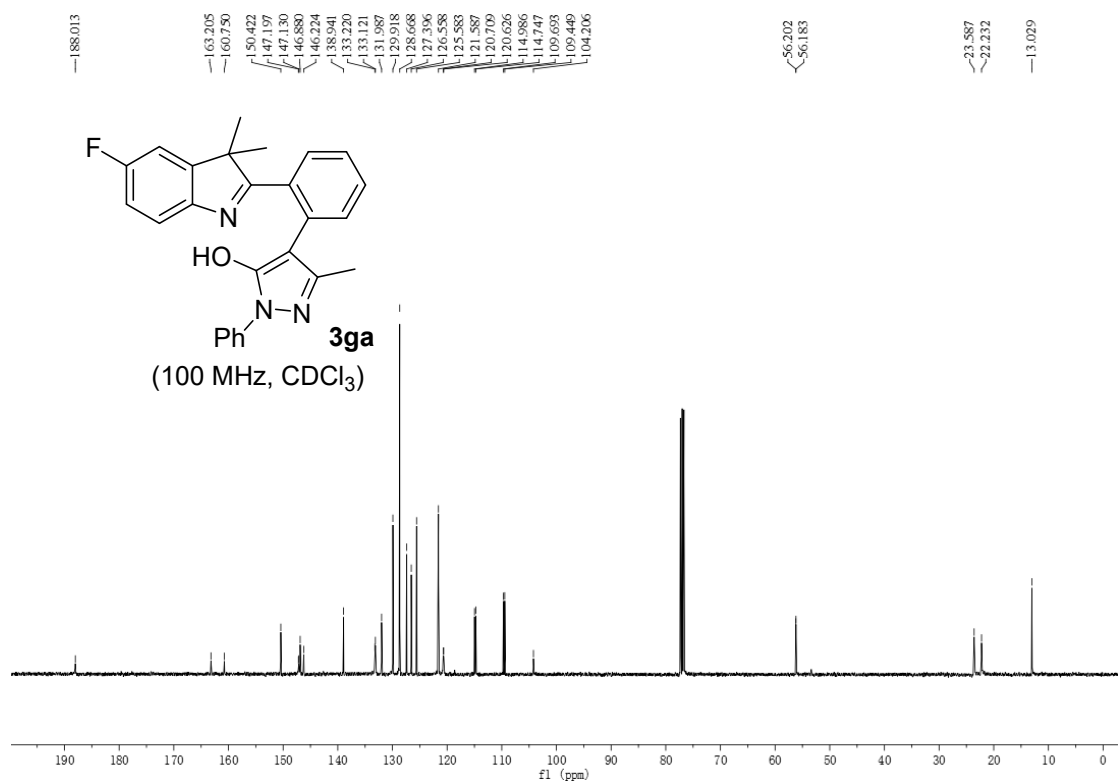

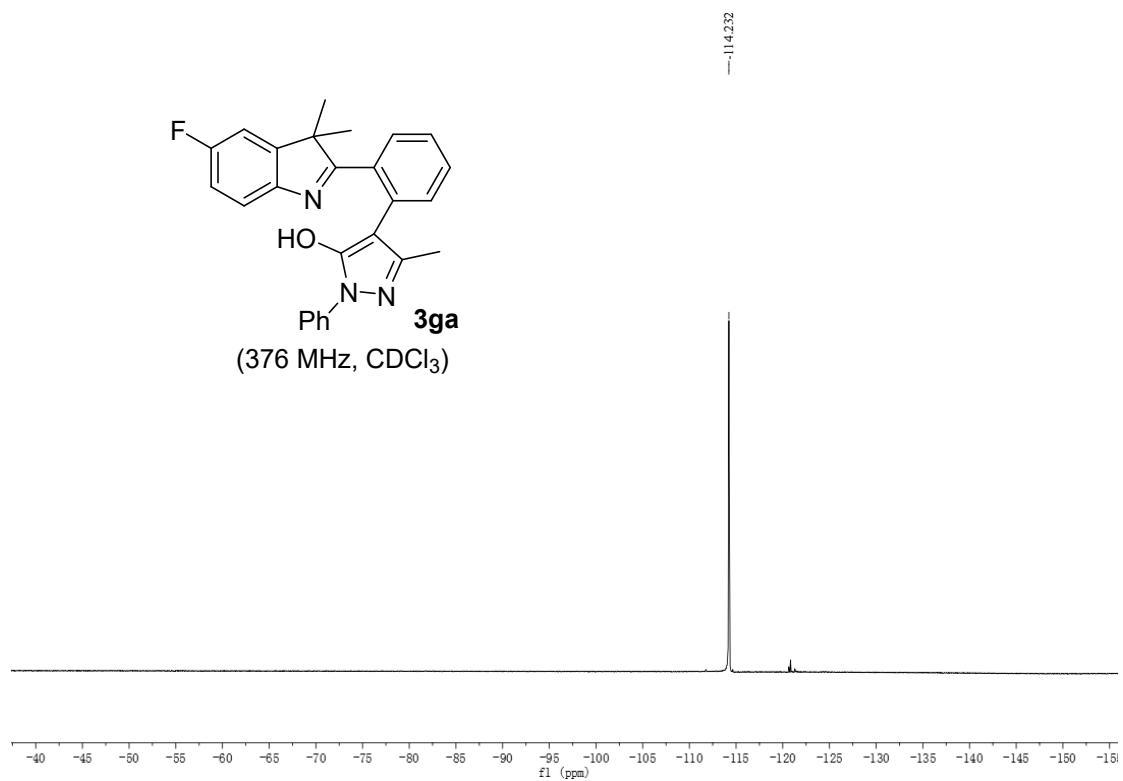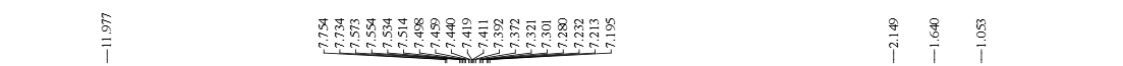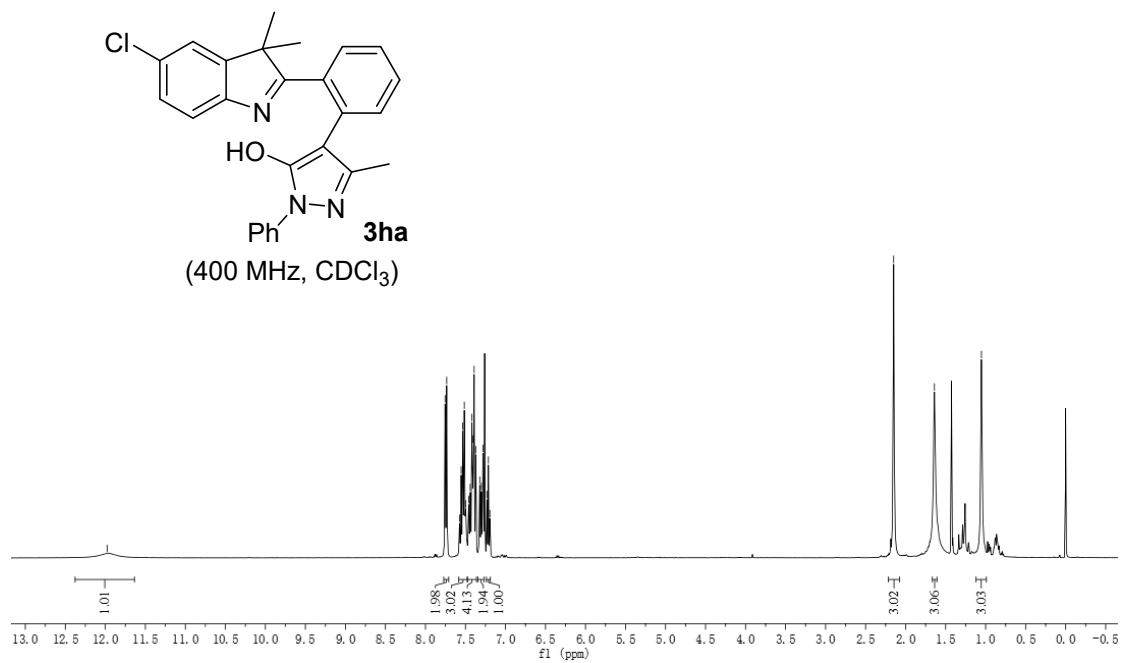

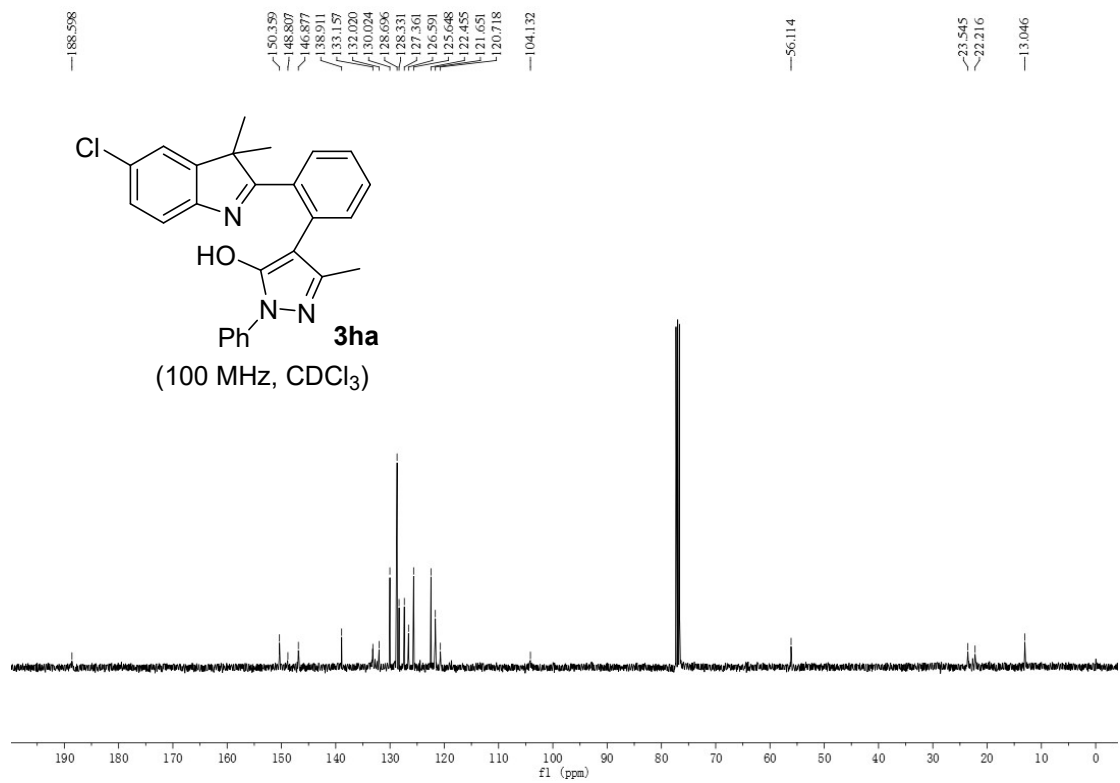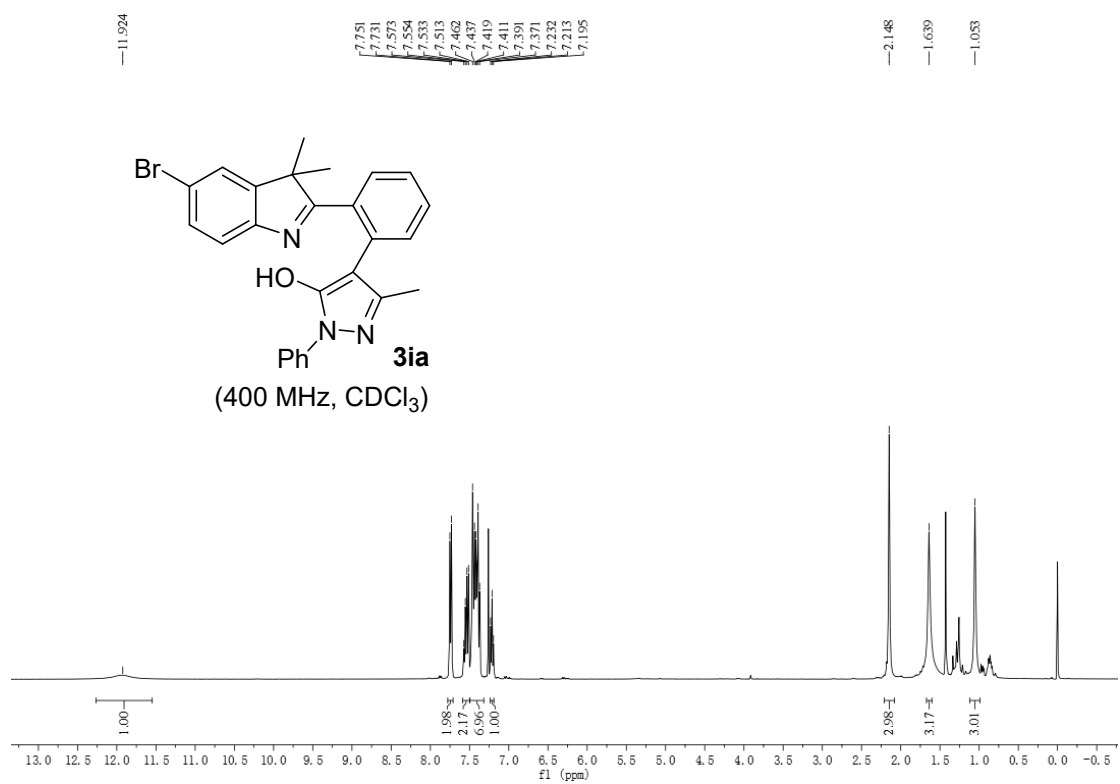

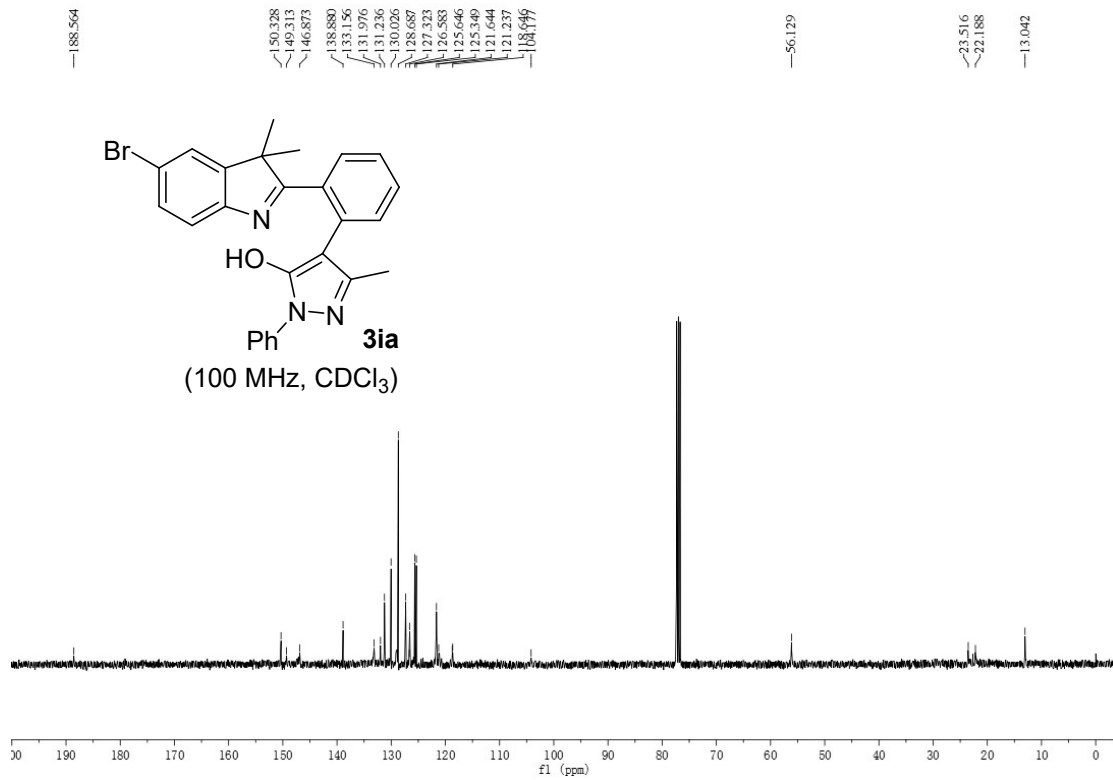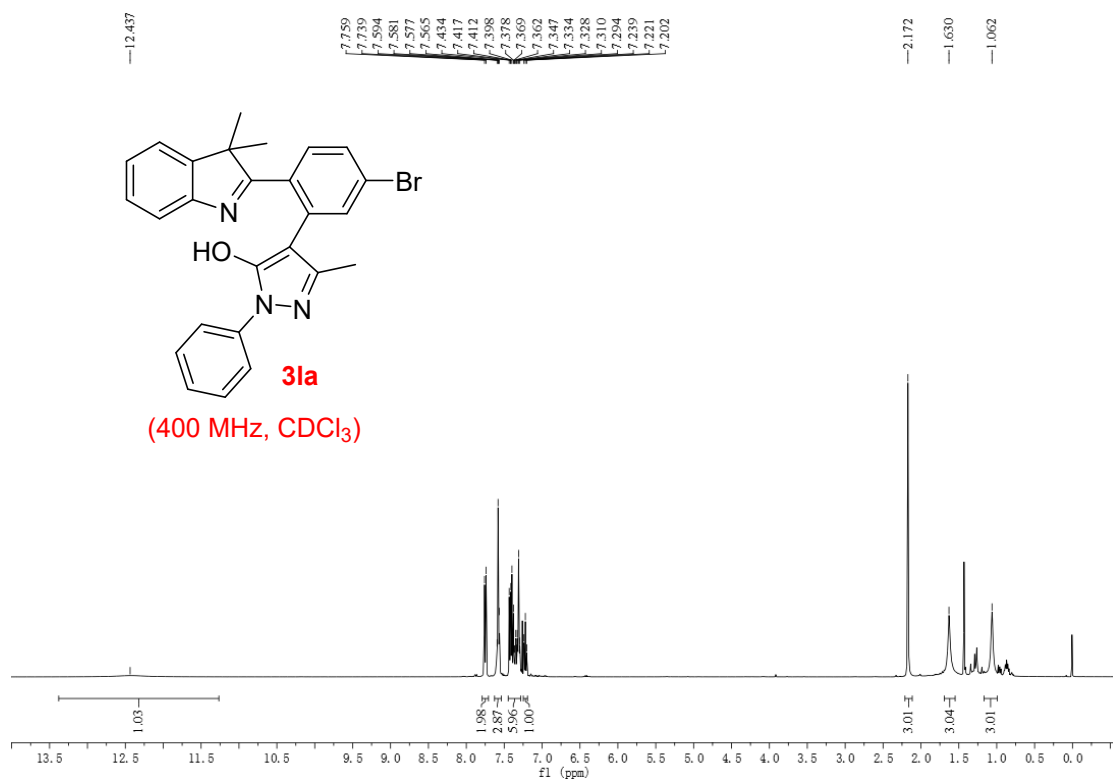

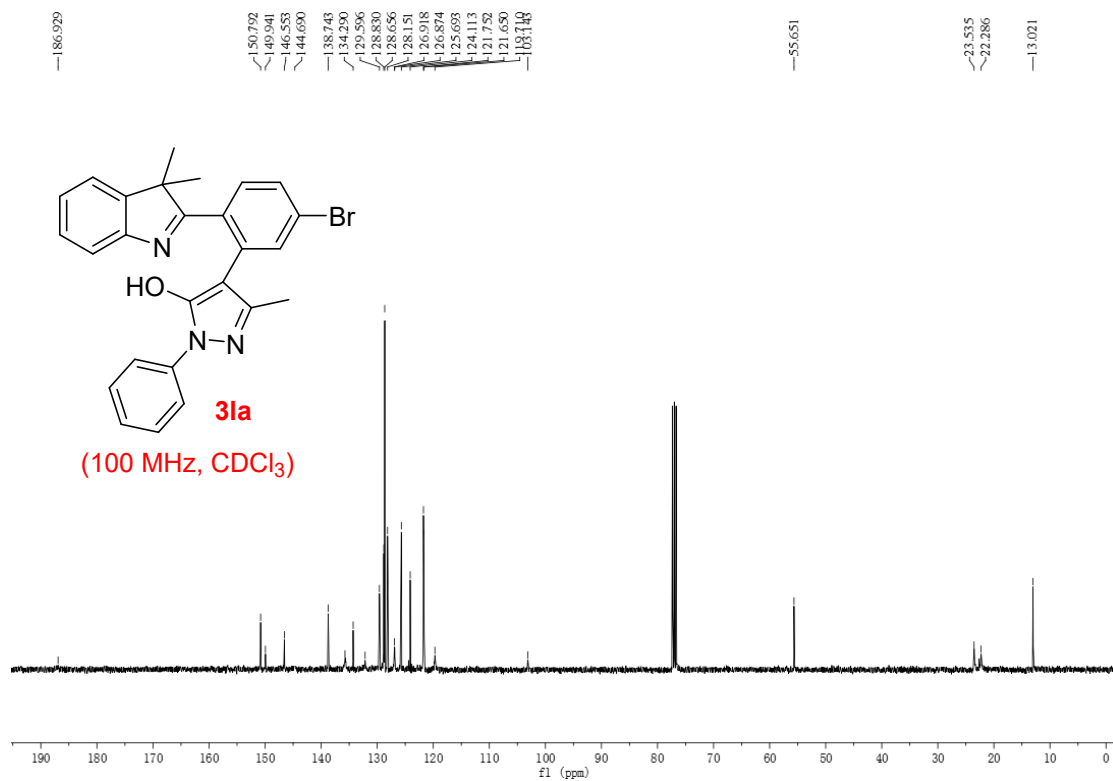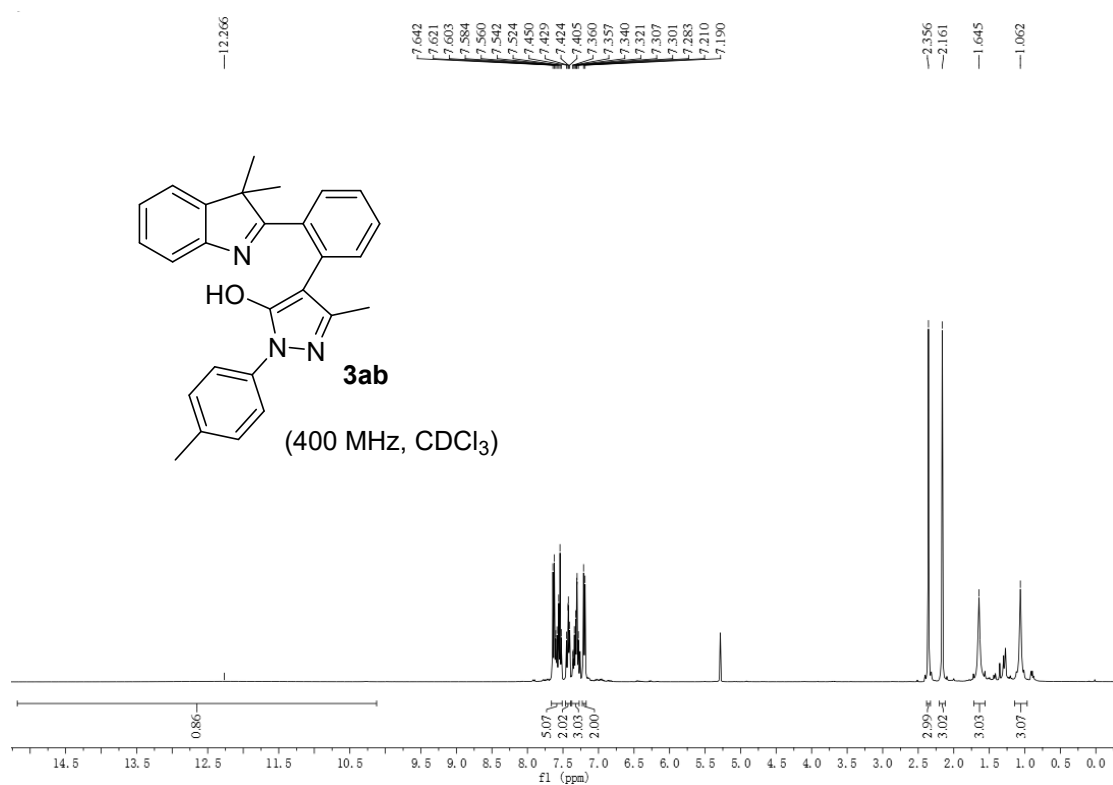



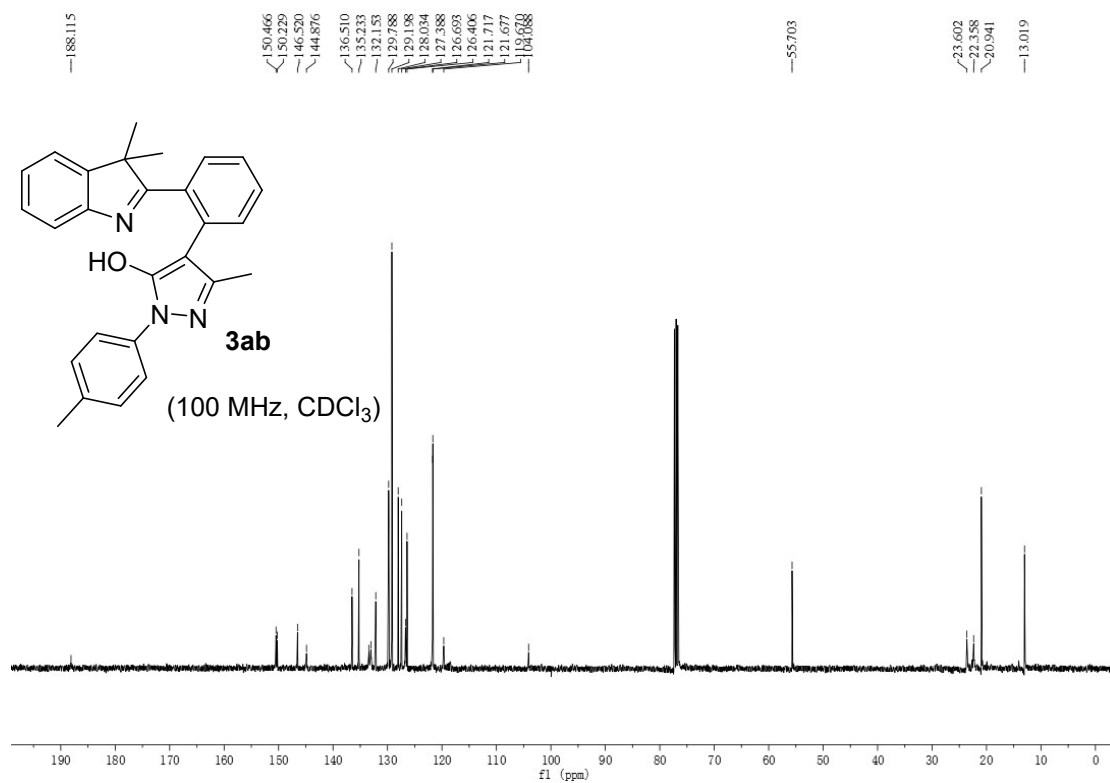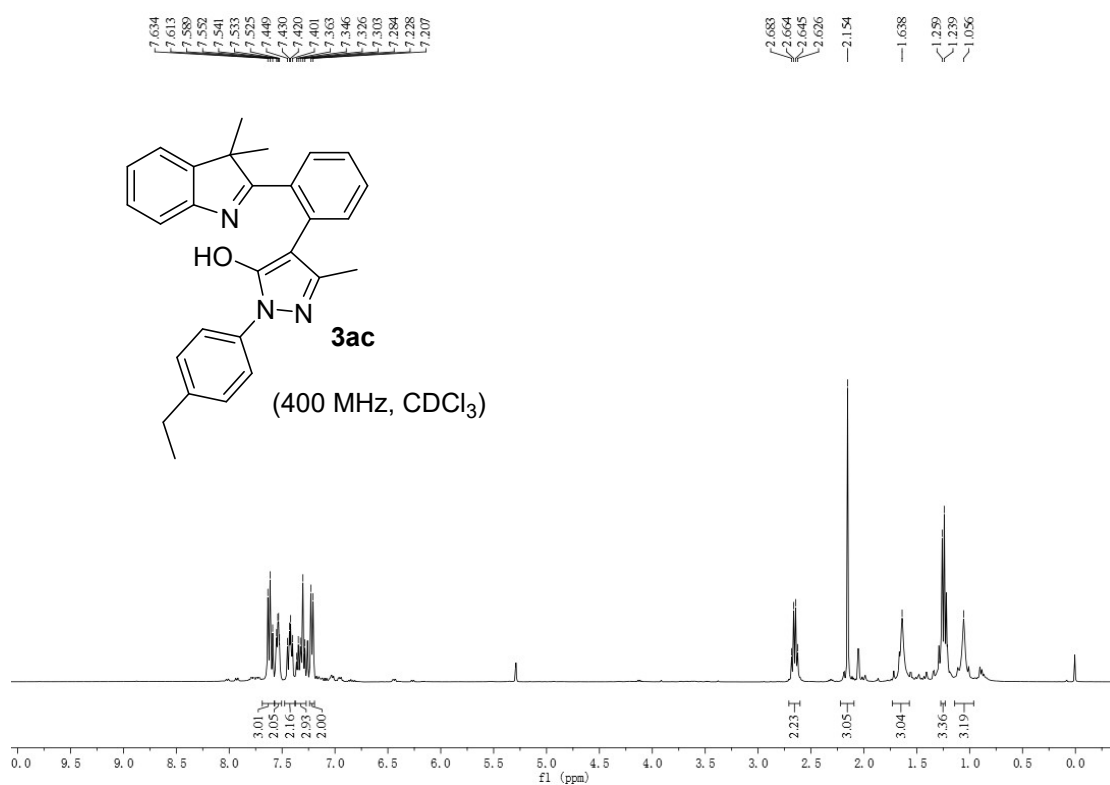

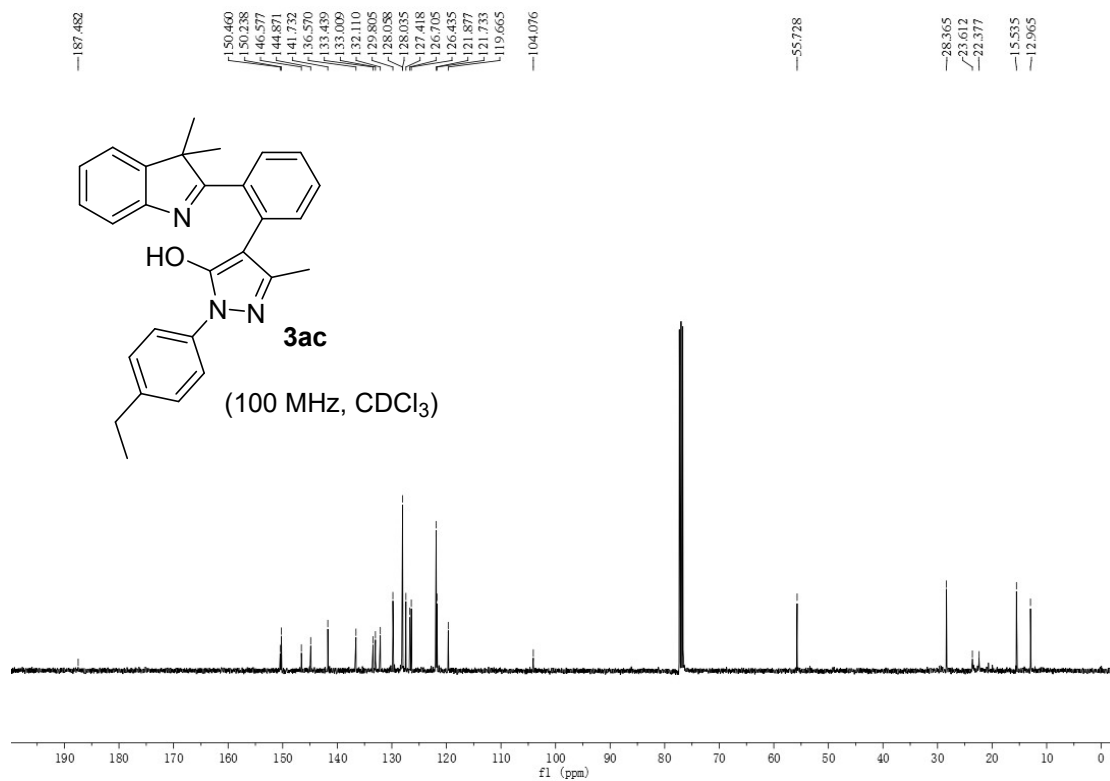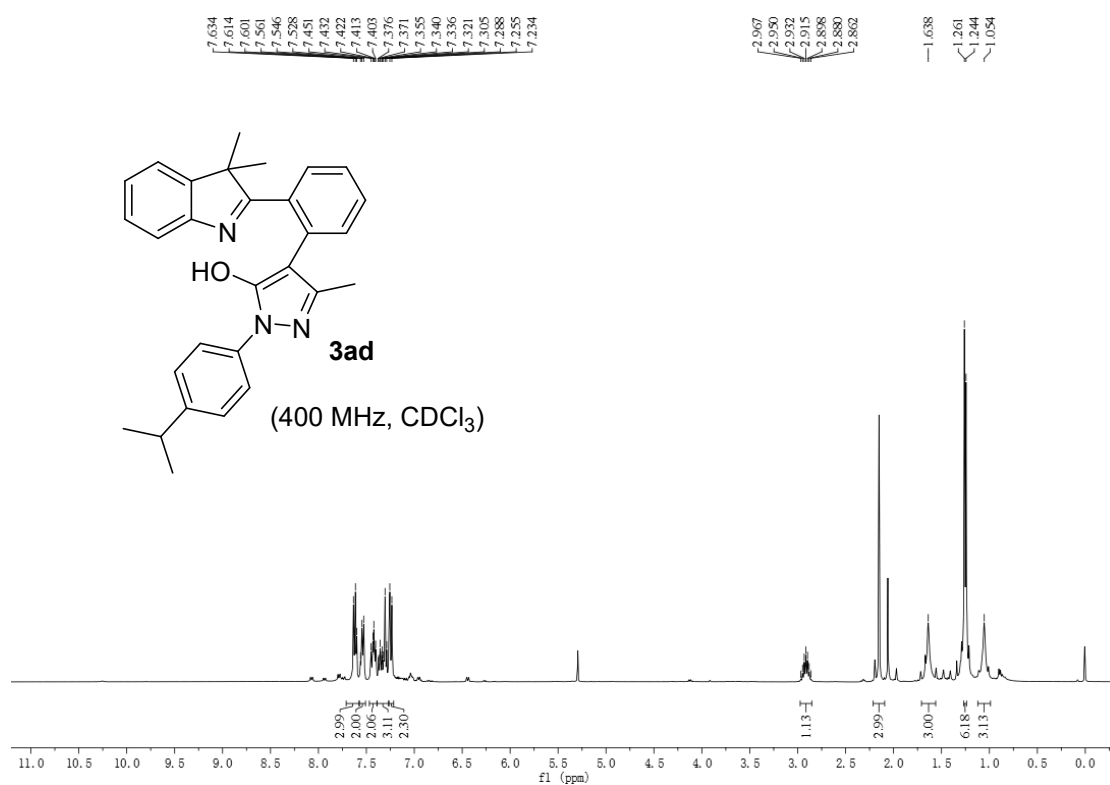

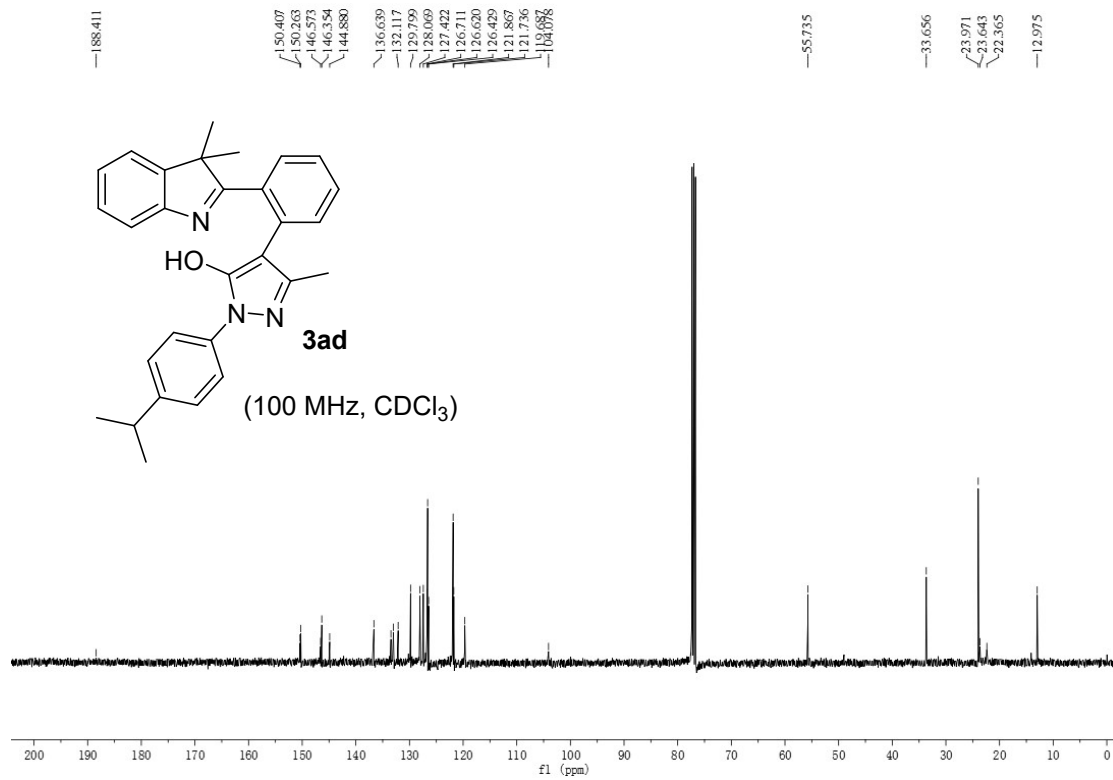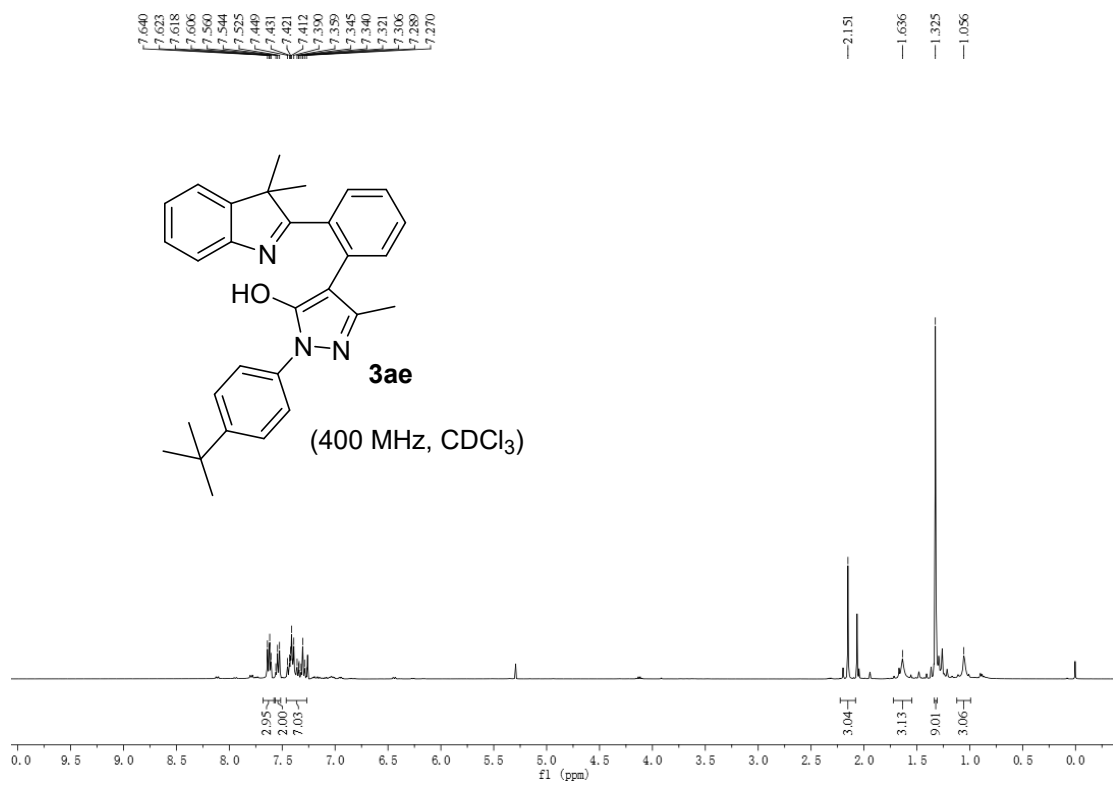

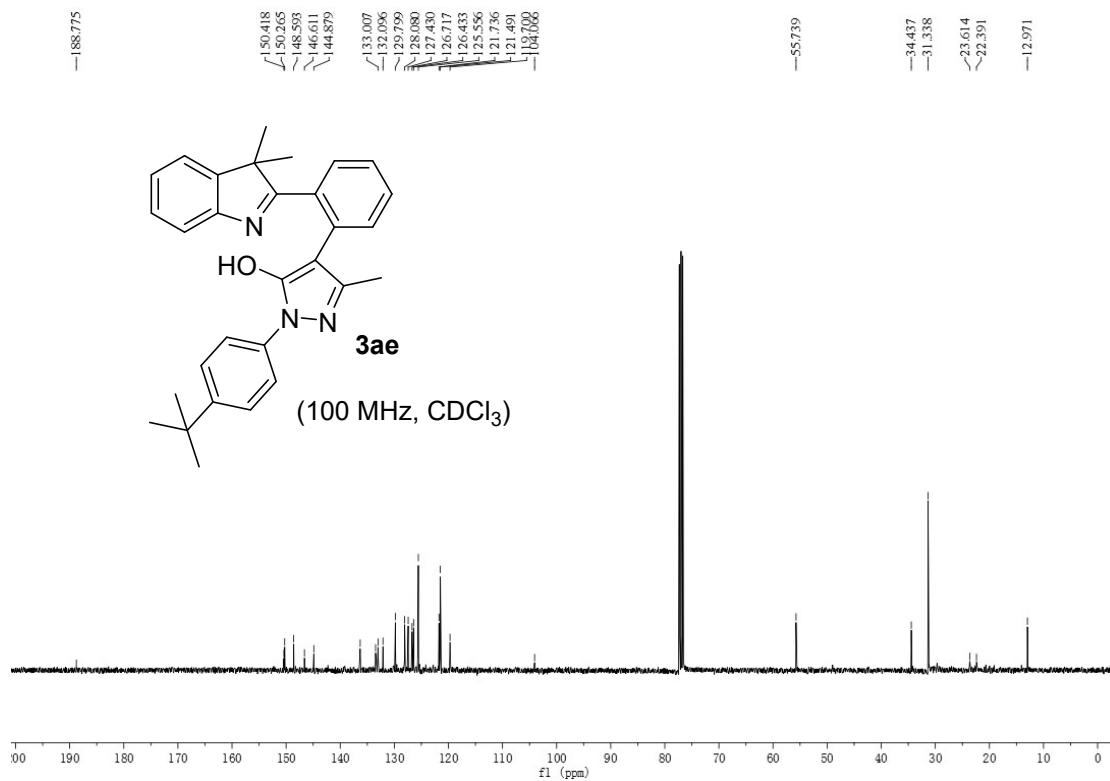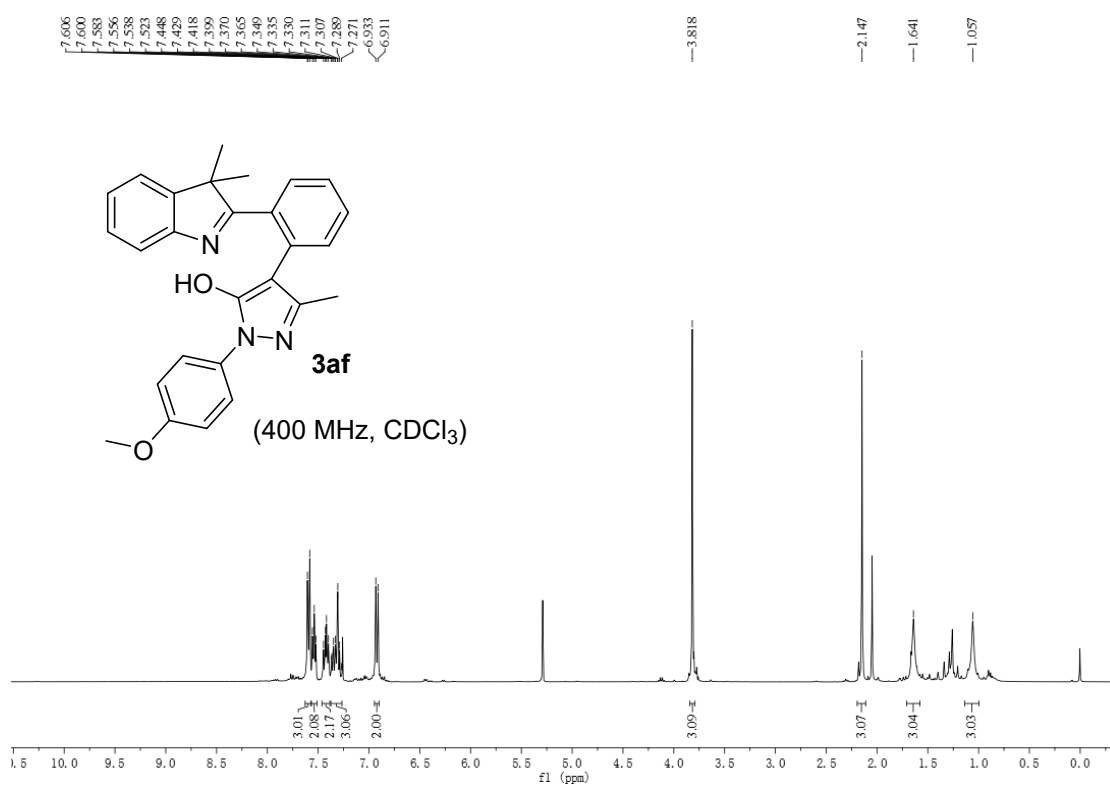

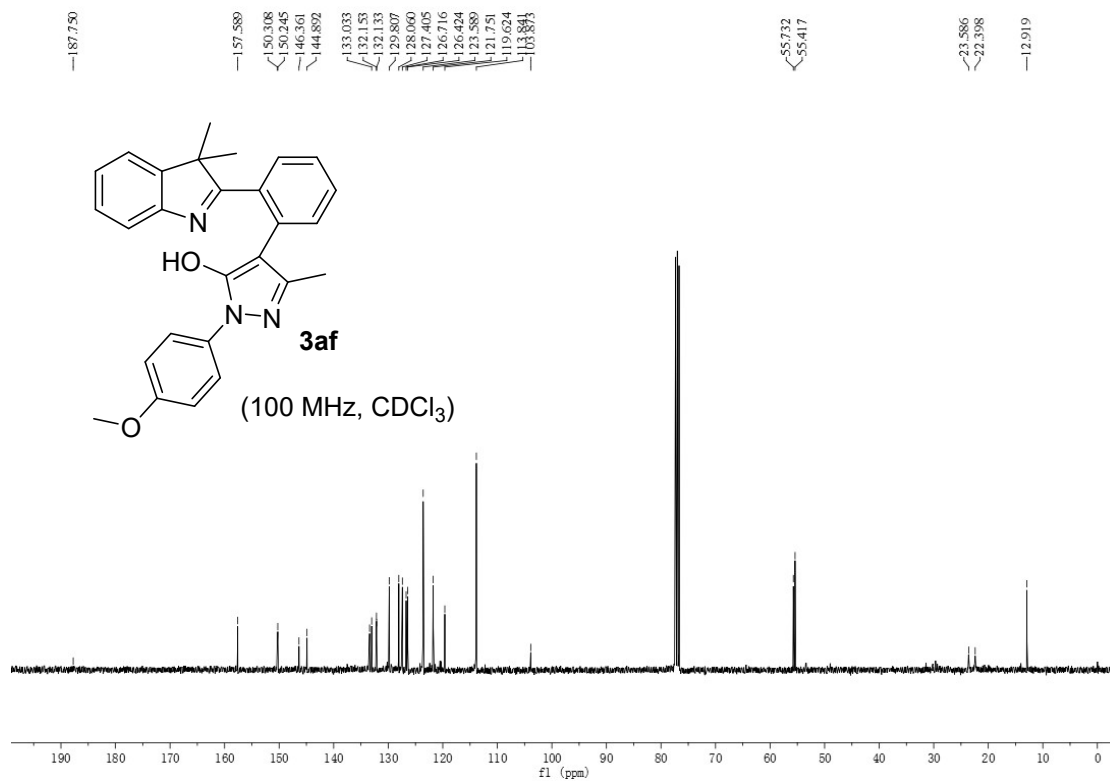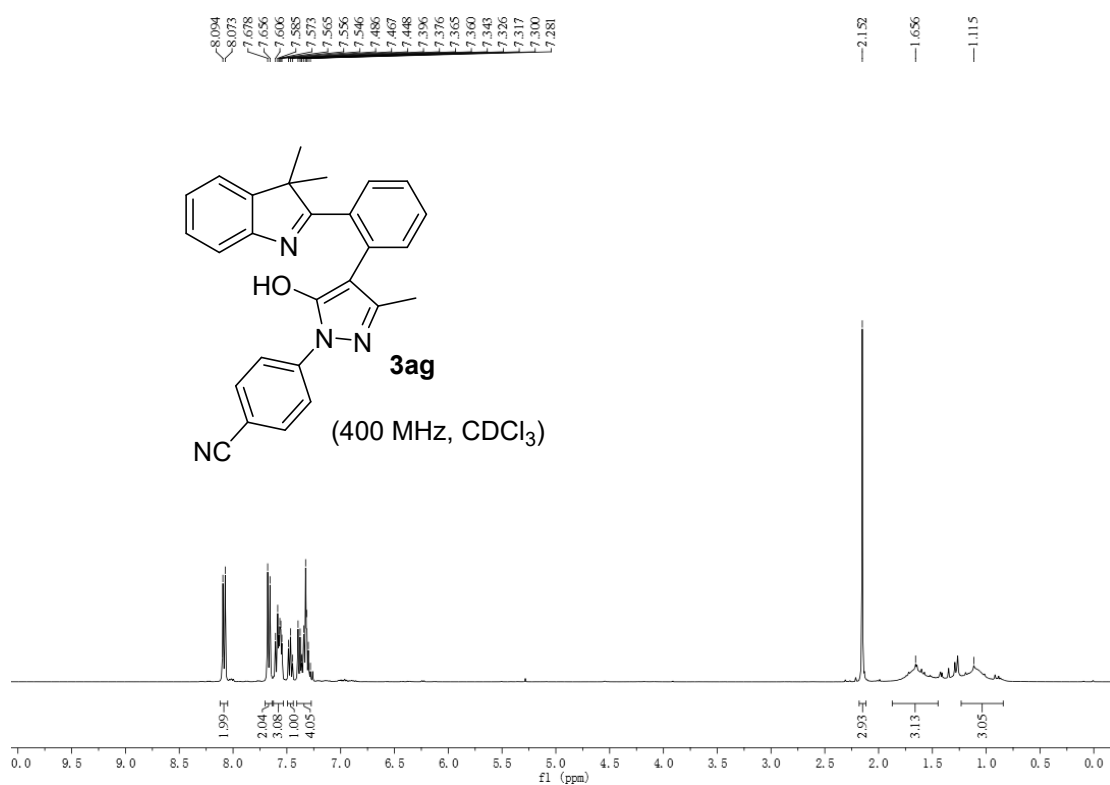

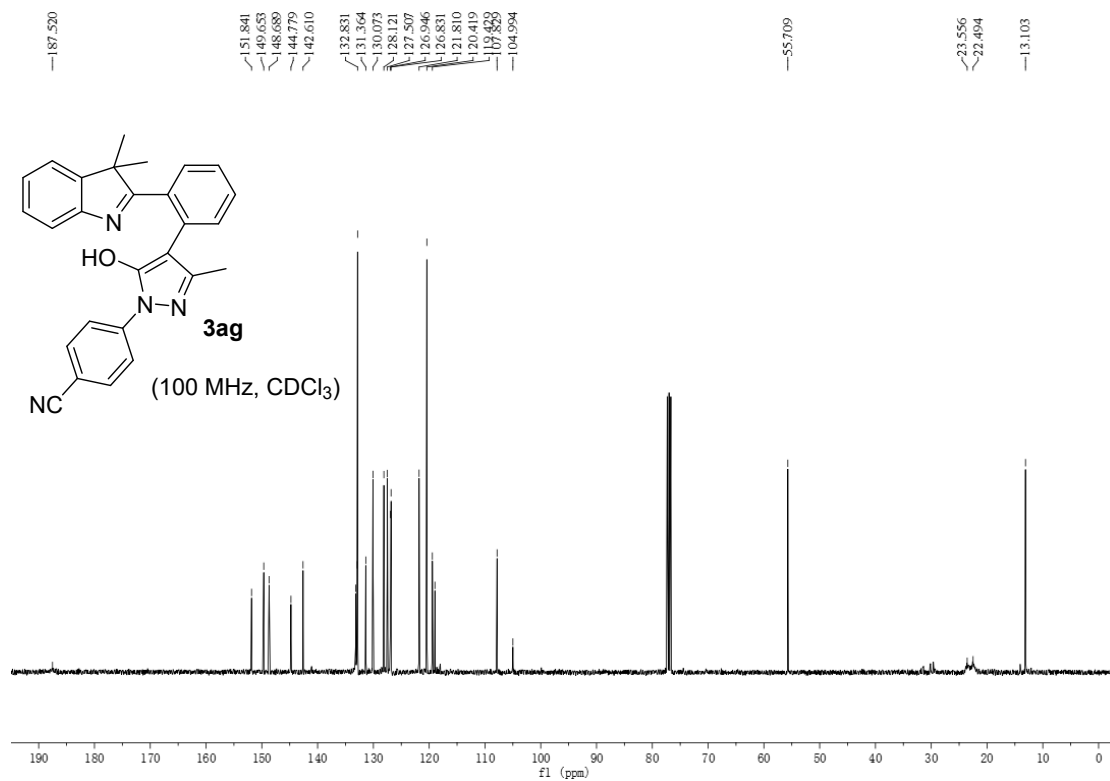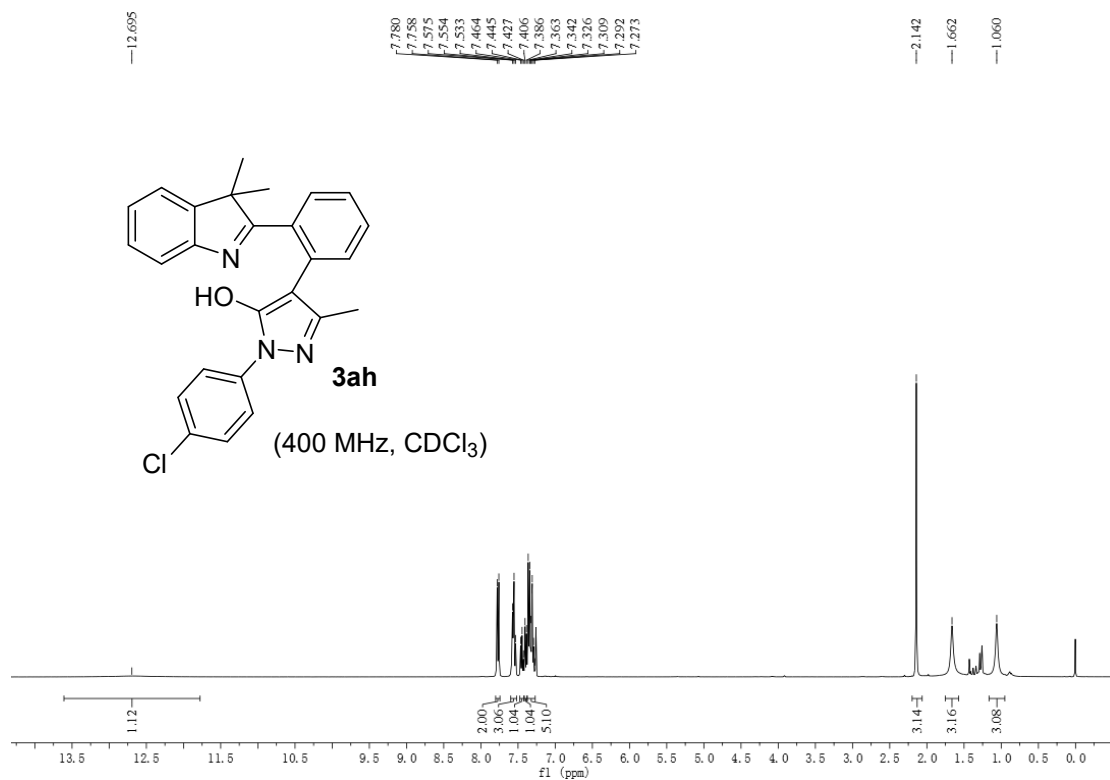

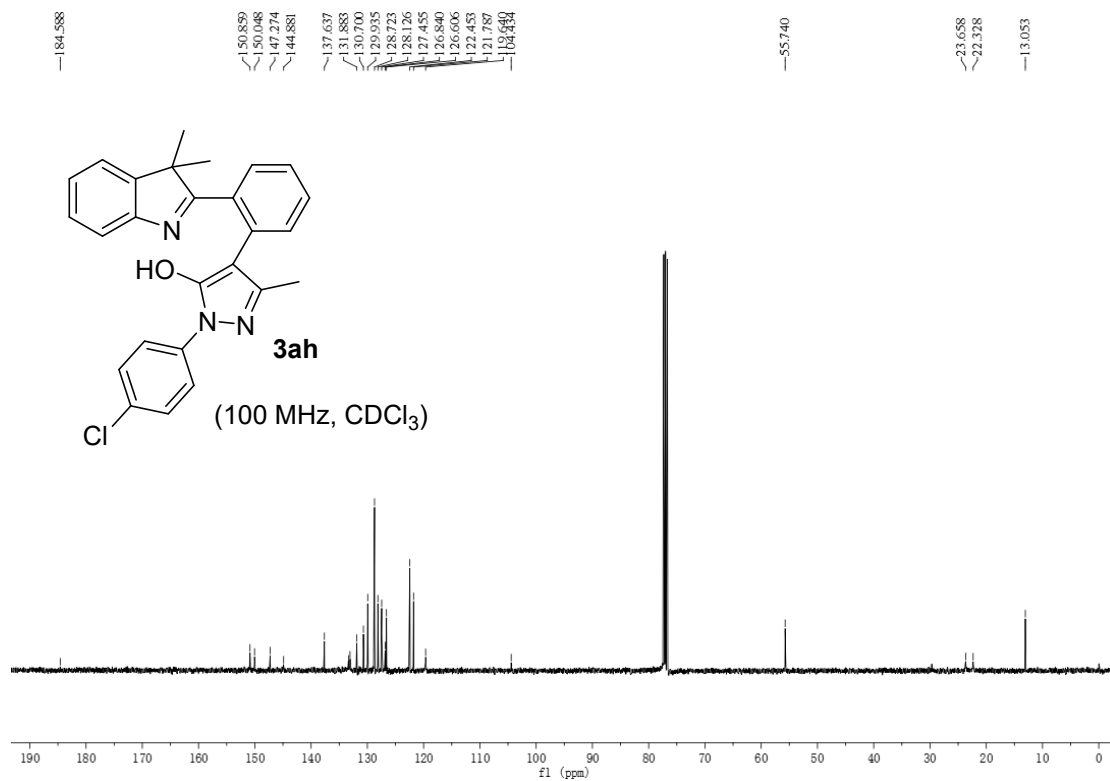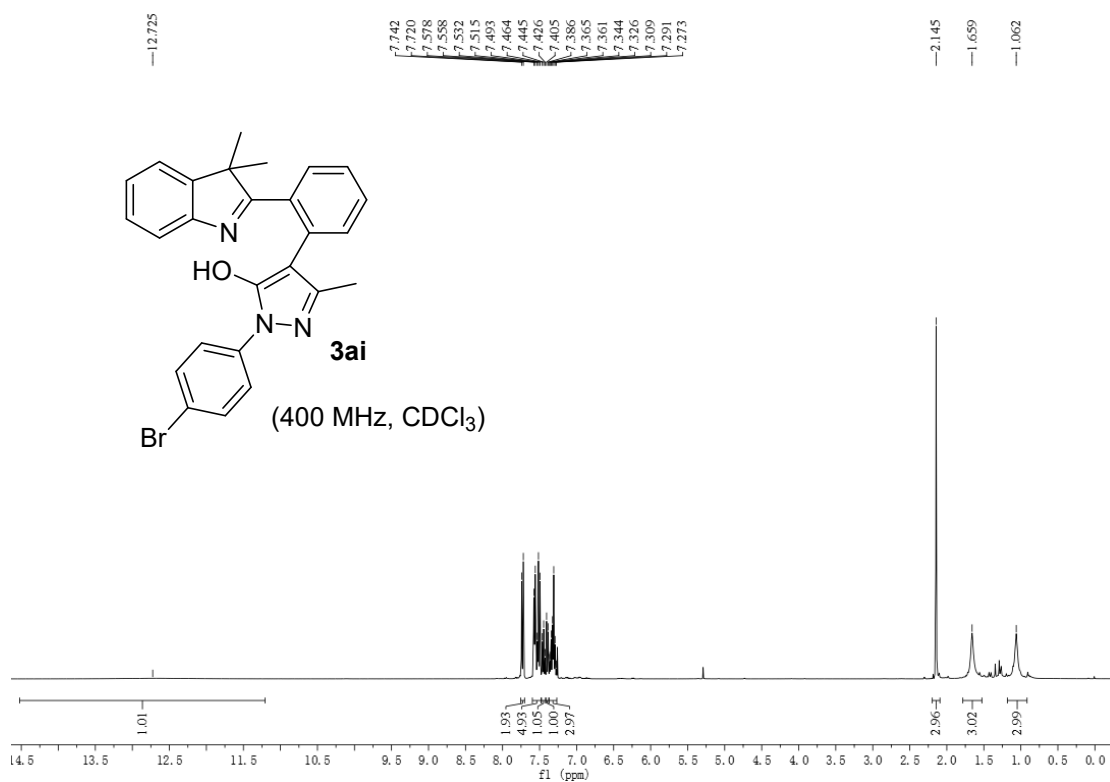

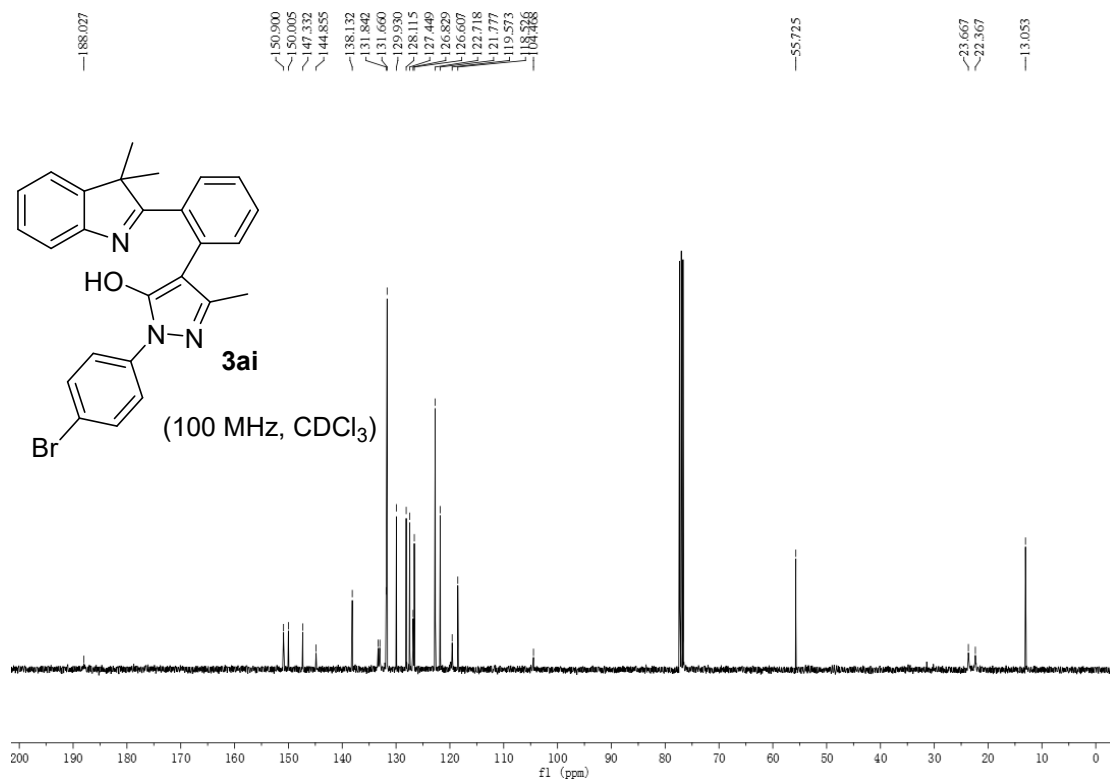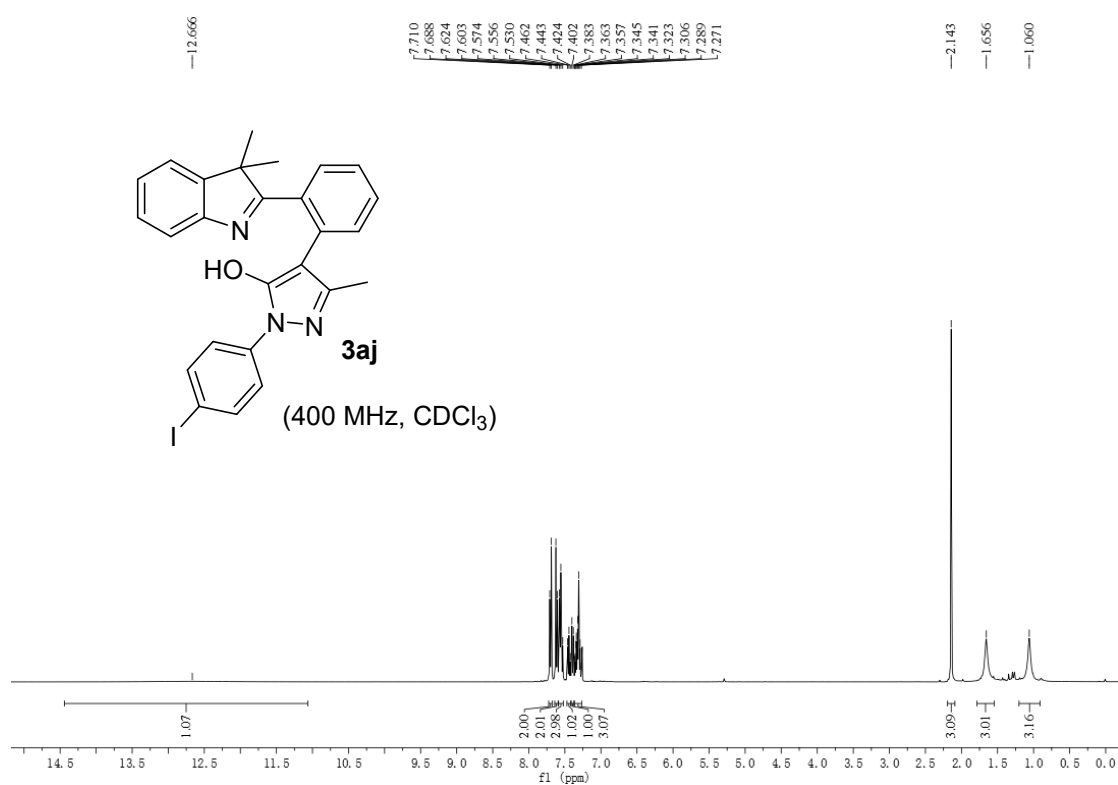



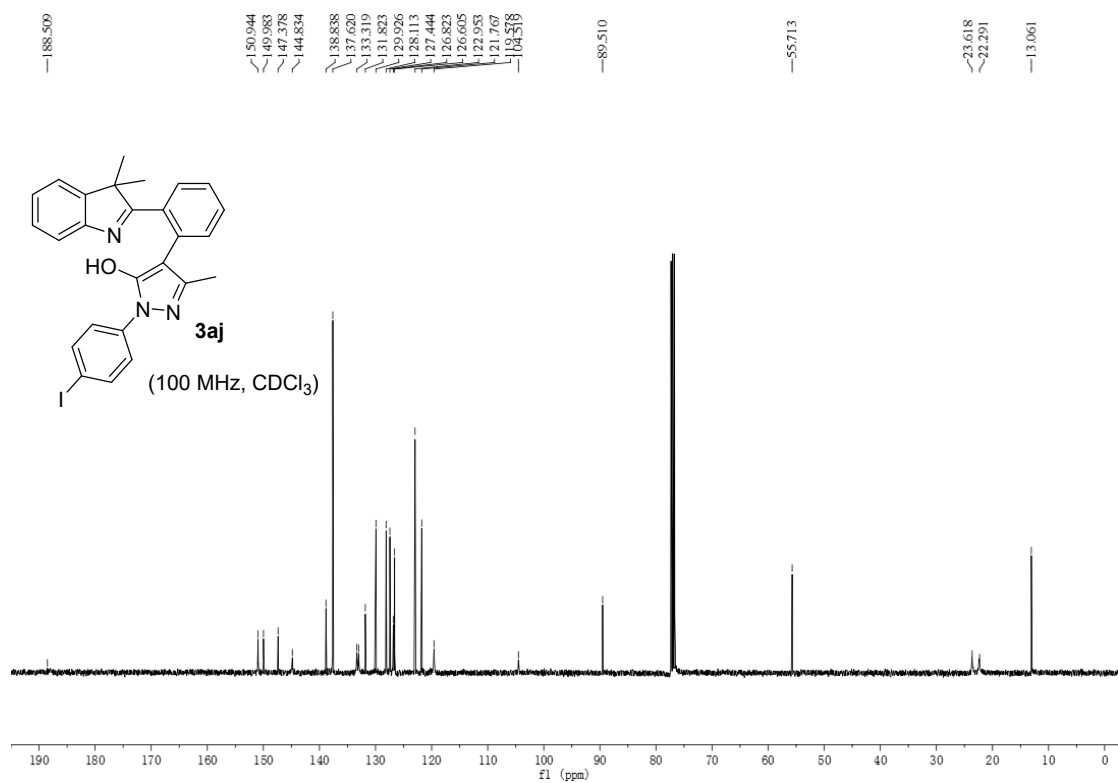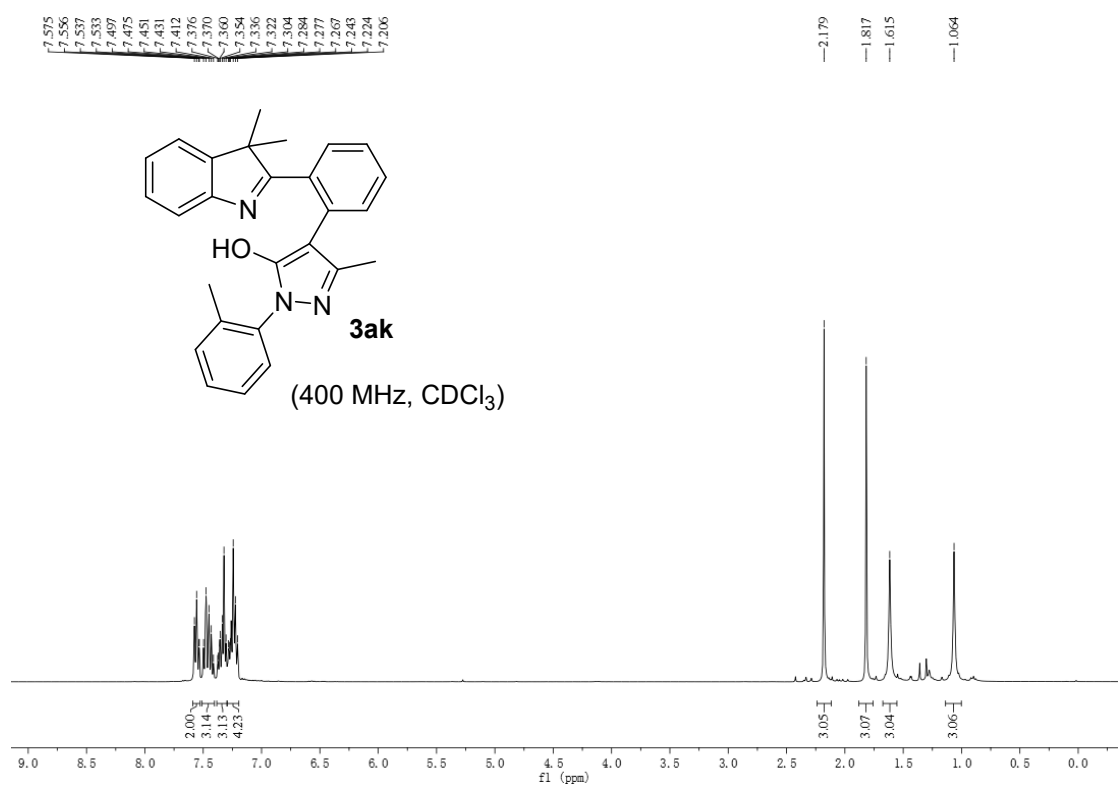

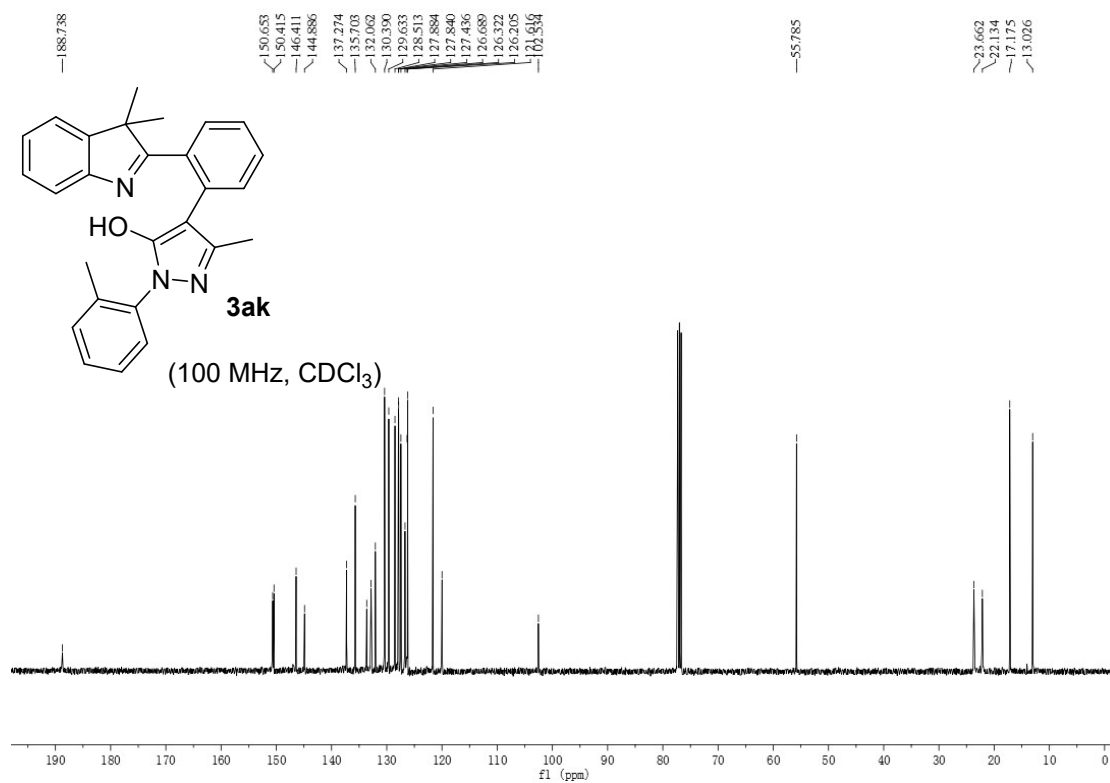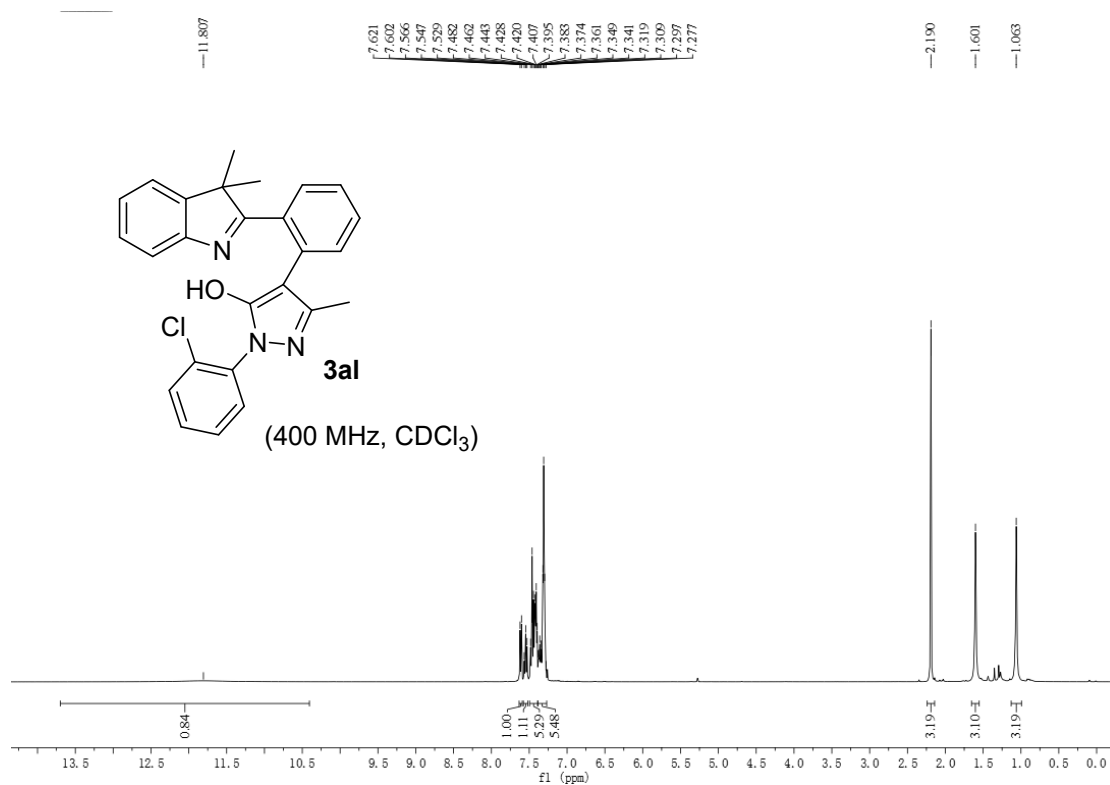

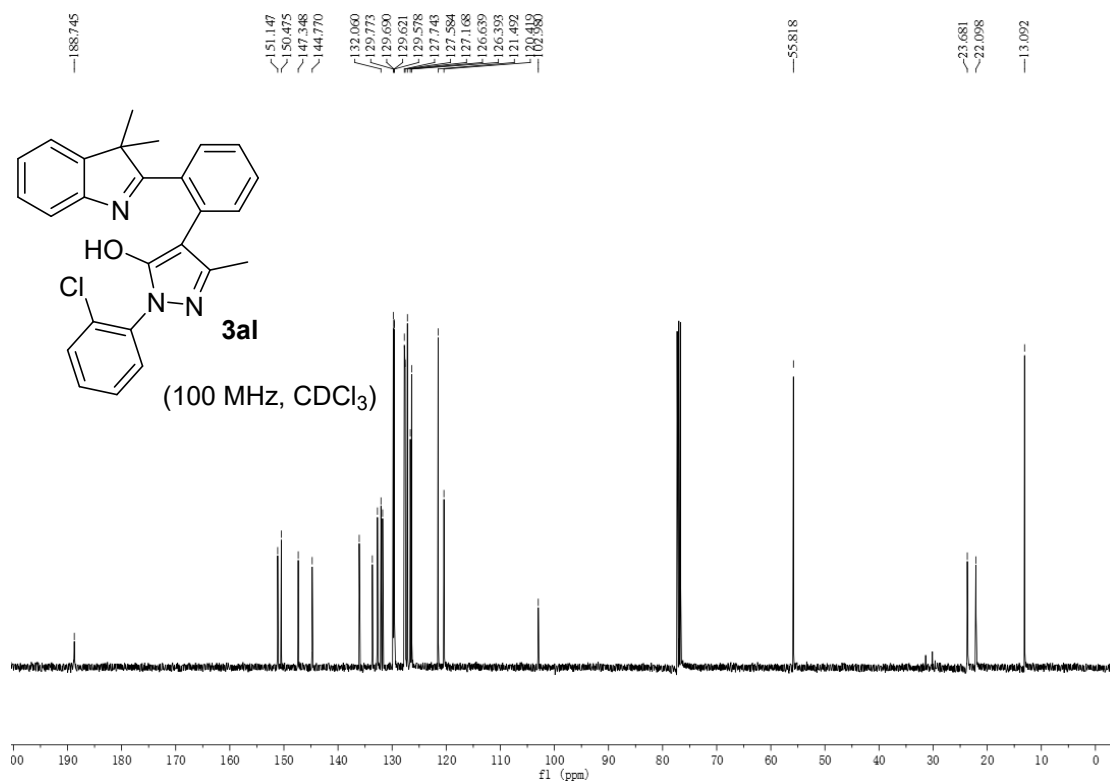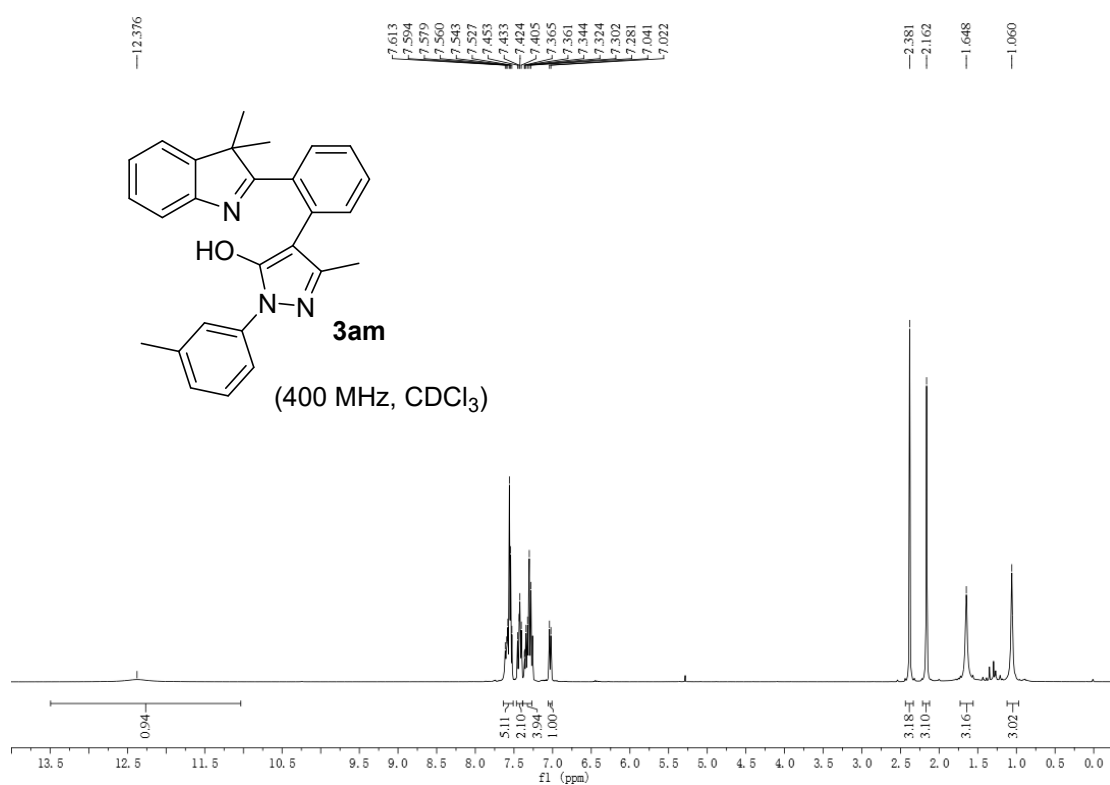

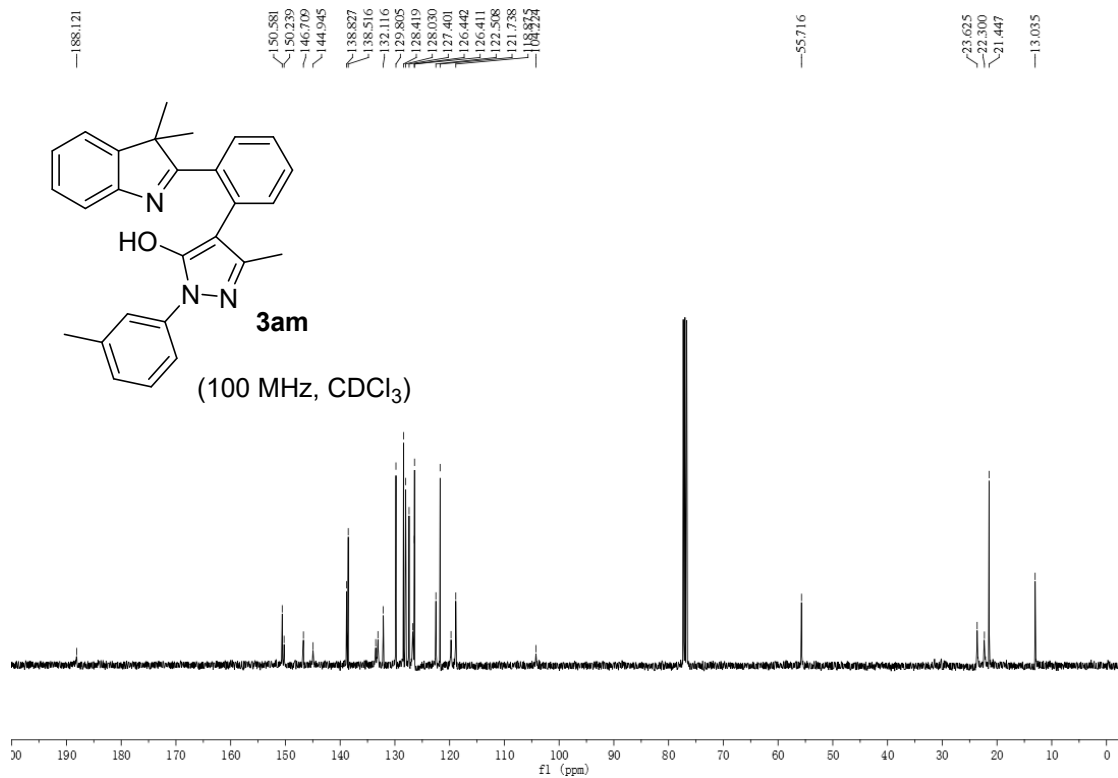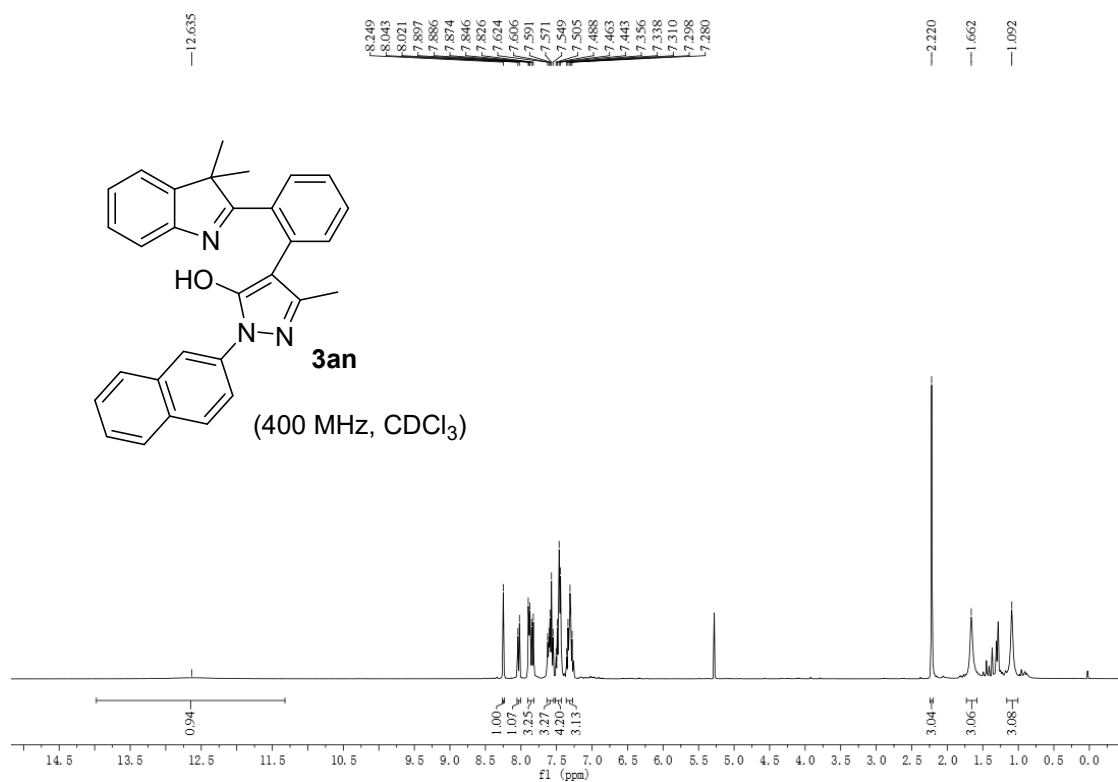

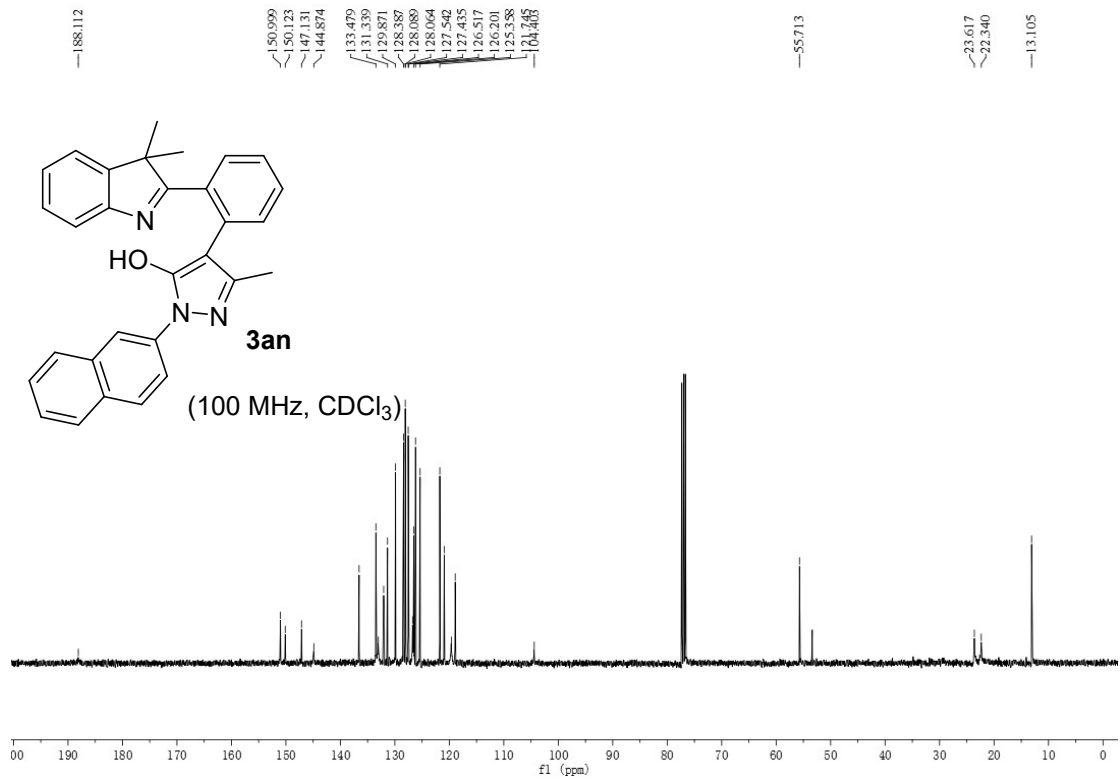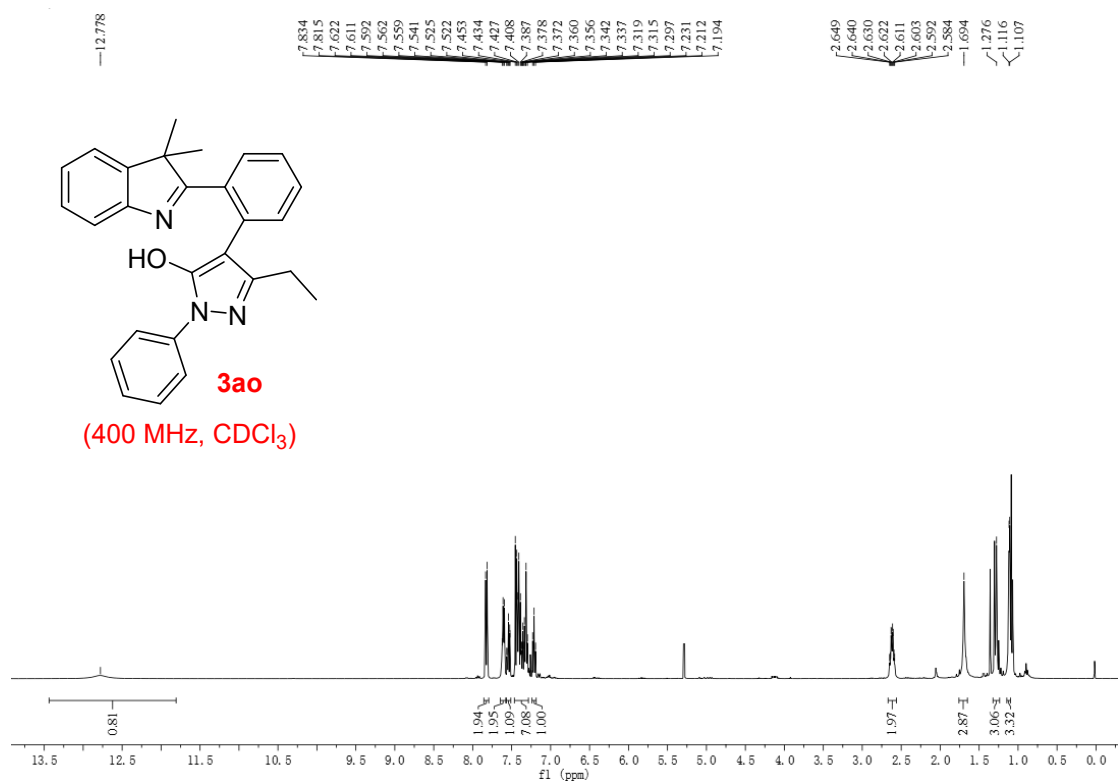

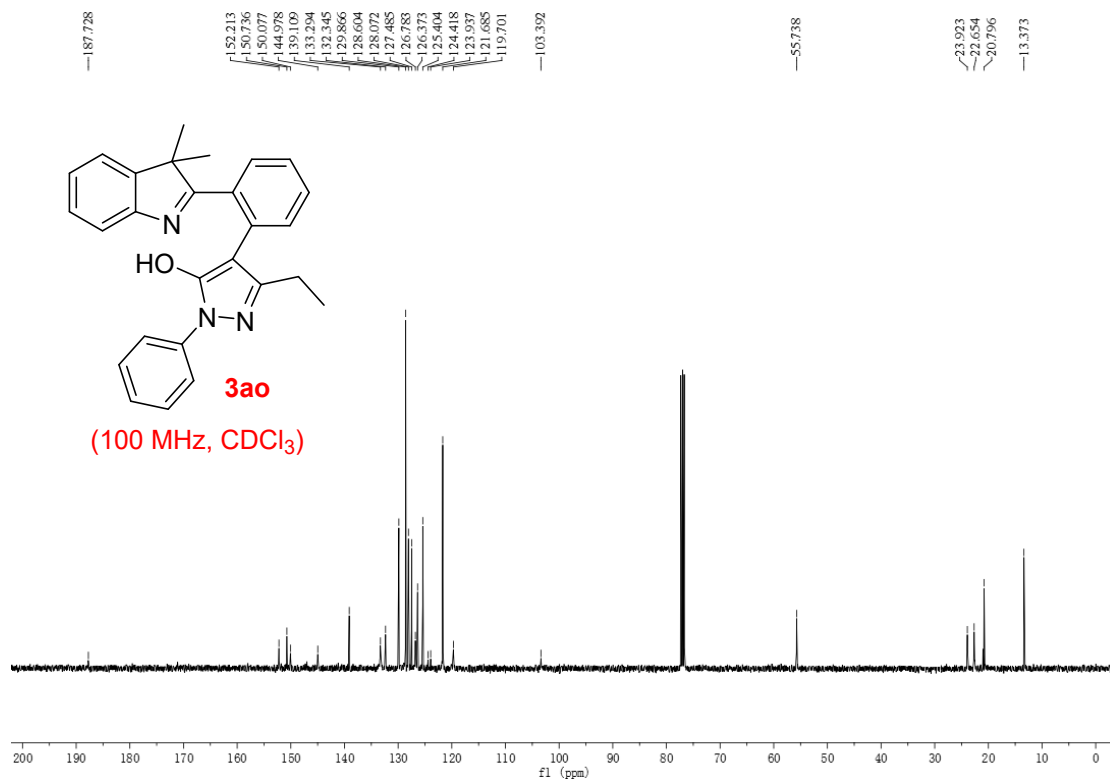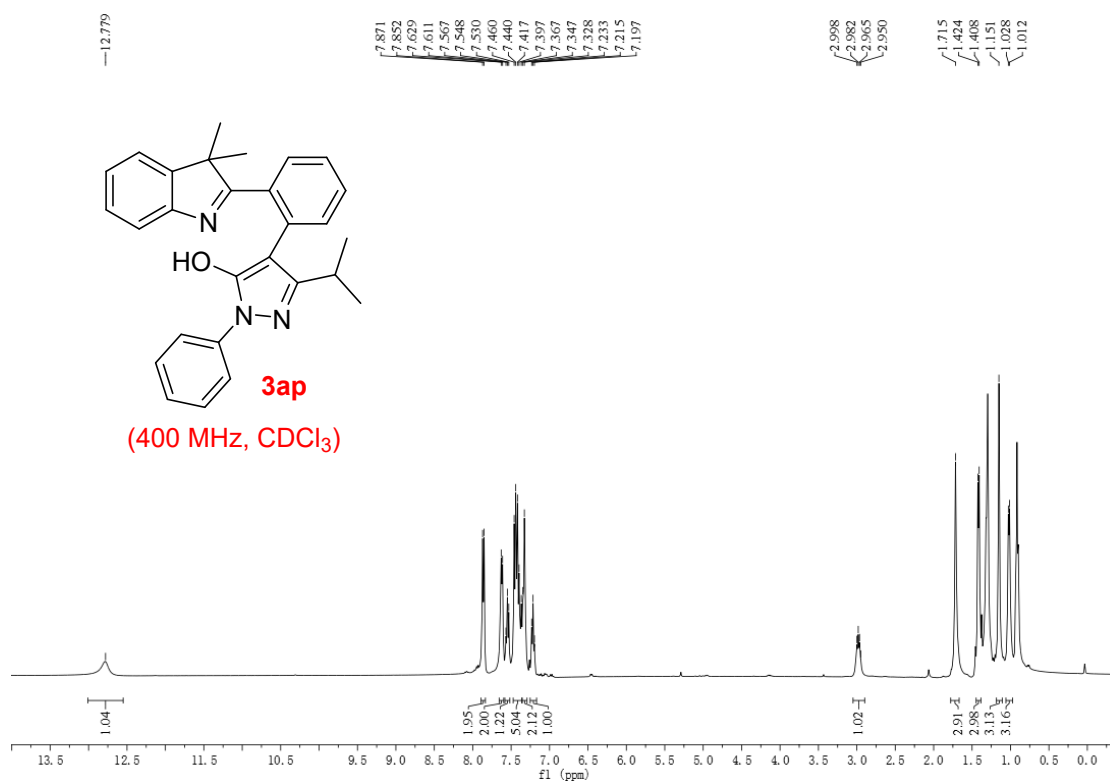

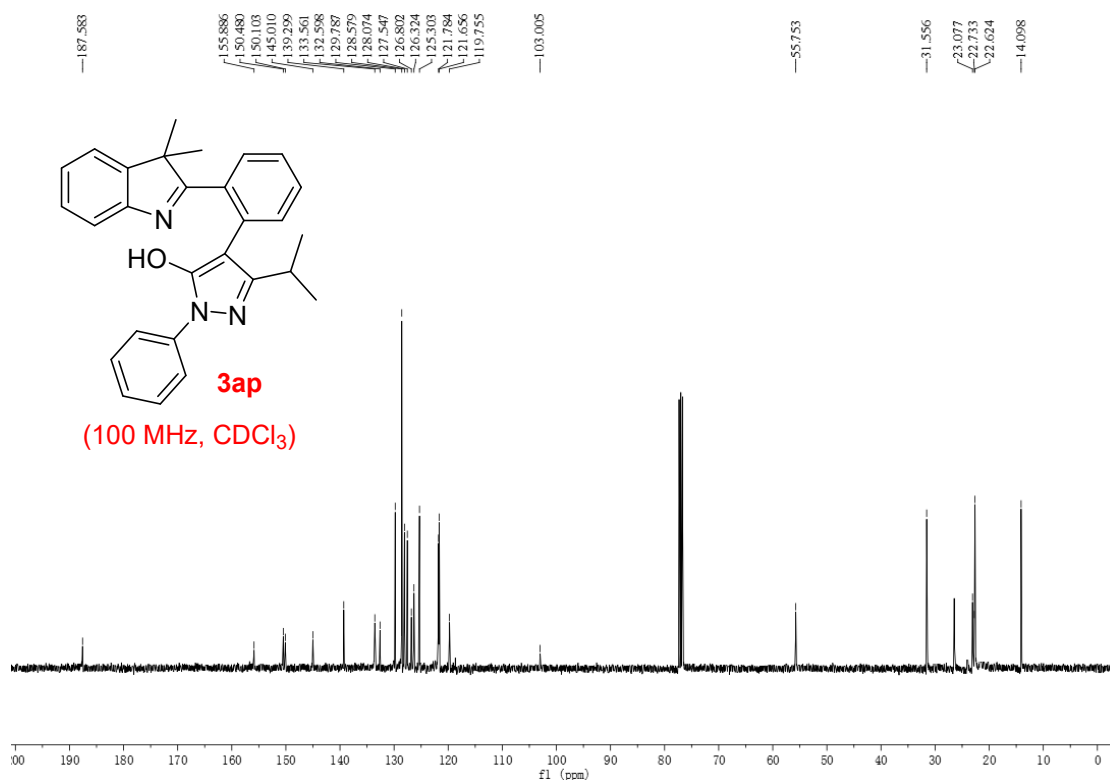

## 8. Cell antiproliferative activity assay

The cell antiproliferative activities of our compounds against HeLa cell were evaluated by the MTT method. HeLa cell suspensions were diluted in growth medium to desired density, and 200  $\mu$ L diluted suspensions were taken to 96-well plates ( $4 \times 10^3$  cells/well). The test compounds with different concentration gradients were prepared. Add 180  $\mu$ L culture medium containing compounds into 96-well plate according to the plate map. Final DMSO concentration in each well was below 1%. Then the cell was incubated at 37  $^{\circ}$ C, 5% CO<sub>2</sub> for 48 h. Equilibrate the assay plate to room temperature before measurement. Add 20  $\mu$ L of MTT into each well. Mix contents for 2 minutes on an orbital shaker to induce cell lysis. Incubate at 37  $^{\circ}$ C and 5% CO<sub>2</sub> for 4 hours, the cell medium was discarded and DMSO (150  $\mu$ L) was added. The absorbance of the wells was measured at 570 nm (BioTeK Synergy H1), and the viability of the untreated cells was set to 100% as a reference. The IC<sub>50</sub> values were calculated using GraphPad Prism 6.0 software and determined by the concentration causing a half-maximal percent activity. All assays were conducted with two parallel samples and two repetitions, and 5-fluorouracil was used as the positive control.
